# Supplementary material for: Loss of miR-23b/27b/24-1 Cluster Impairs Glucose Tolerance via Glycolysis Pathway in Mice
Source: MDPI journal article supplement (doi:10.3390/ijms22020550), 2021-01-07
Supplement: s1 [file s1]

# Supplementary Materials

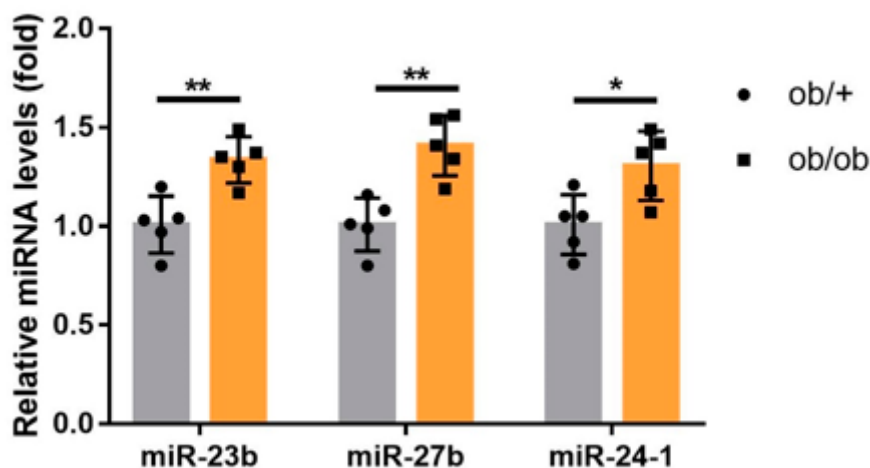

**Figure S1.** Expression pattern of the miR-23b cluster. miR-23b, miR-27b, and miR-24-1 were increased in the liver of ob/ob mice ( $n = 4-5$ ). Data are represented as mean  $\pm$  SEM. Significance was determined by Student's  $t$ -test analysis, \*  $p < 0.05$ , \*\*  $p < 0.01$ .

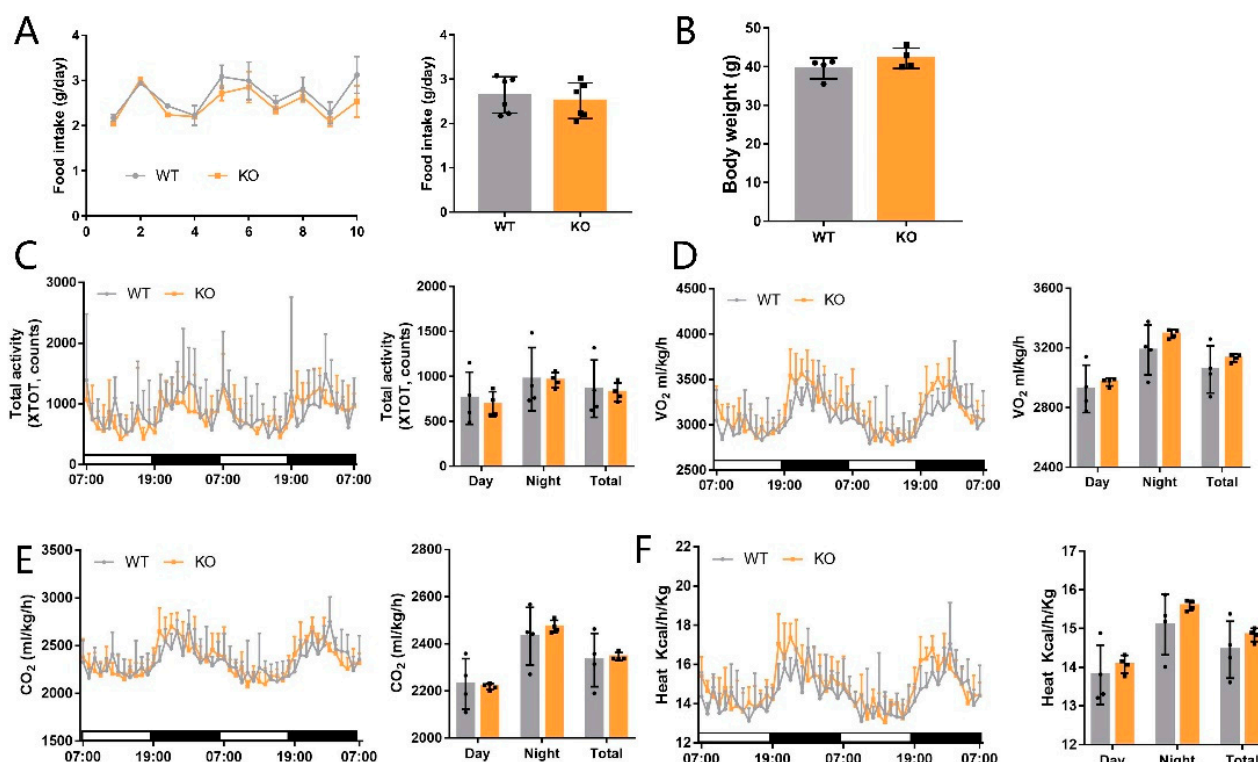

**Figure 2.** Overall metabolic alterations in knockout mice. (A) Continuous monitoring of food intake for 10 days in WT and KO mice fed an HFD ( $n = 6$ ). Right panel, average food intake per mouse. (B) Body weights of KO and WT mice before metabolic cage experiments. (C–F) Total activity (XTOT), Oxygen consumption (VO<sub>2</sub>), CO<sub>2</sub> production (VCO<sub>2</sub>), and heat production were measured during 2 successive days using metabolic cages. The daytime and night-time averages are on the right panel. Mice were feed under HFD ( $n = 4v4$ ). Data are represented as mean  $\pm$  SD. Significance was determined by Student's  $t$  test analysis.

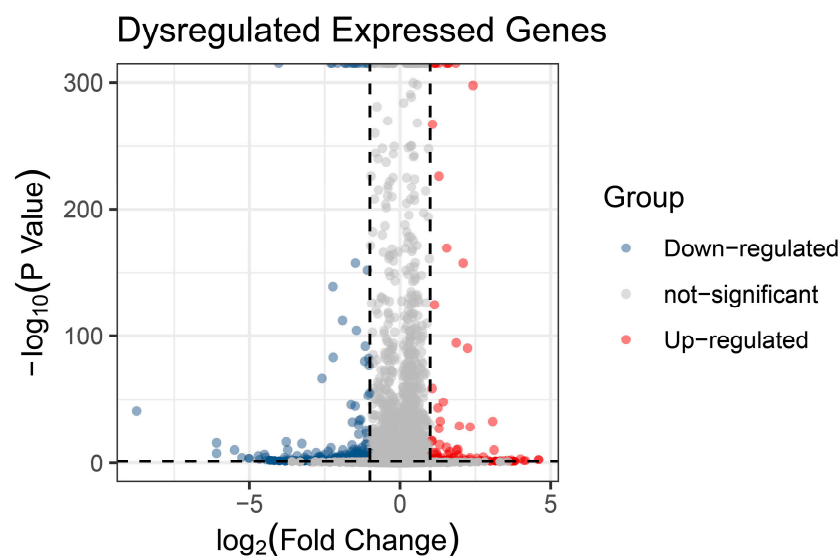

**Figure S3.** Liver transcriptome profiles after ablation of miR-23b cluster. Dysregulated expressed genes in miR23b cluster-deficient liver tissue compared with WT mice under HFD. The threshold is set to  $|\text{Log}_2 \text{FC}| > 1$  and  $Q\text{-value} < 0.05$ . Red dots represent upregulated and blue dots represent downregulated.

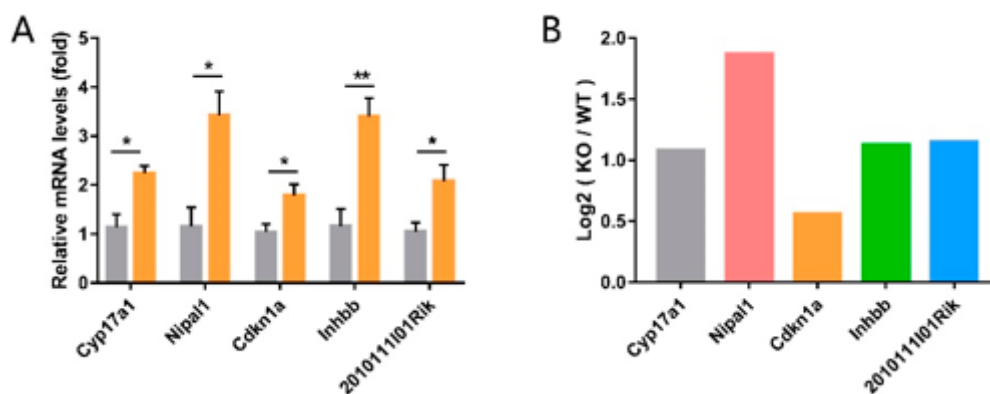

**Figure S4.** Validation of RNA-seq results. (A) qPCR analysis of mRNA levels from RNA-seq data with relatively high fold changes, high expression, and low  $p$ -values ( $n = 4$ ). (B)  $\text{Log}_2 \text{FC}$  of validated genes from transcriptomics. Data are represented as mean  $\pm$  SEM. Significance was determined by Student's  $t$  test analysis, \*  $p < 0.05$ , \*\*  $p < 0.01$ .

**Table S1.** Primer sequences for quantitative real-time PCR.

| Target         | Forward Primer (5'-3')    | Reverse Primer (5'-3')   |
|----------------|---------------------------|--------------------------|
| N209           | GCTGTGTTGTCAAGAGTGCA      | CAGCAGGGACAAAGAACCAC     |
| T1348          | CCAGAGACATCCCAACCCAT      | AGACAGGCATTCTCACTGCT     |
| <i>Pklr</i>    | GATCCGAAGTTCCGGACAAGG     | ATGAGCCCGTCGTCAATGTAG    |
| <i>Cyp17a1</i> | GGCACTGCATCACGATAA        | TCCGAAGGGCAAATAACT       |
| <i>Nipal1</i>  | GTCAGAGTCGCTGCCTTATCC     | TGCAAGAGACCCTTCTTTTGAG   |
| <i>Cdkn1a</i>  | CCTGGTGATGTCCGACCTG       | CCATGAGCGCATCGCAATC      |
| <i>Inhbb</i>   | CTTCGTCTCTAATGAAGGCAACC   | CTCCACCACATTCCACCTGTC    |
| 2010111101Rik  | GTCAACATGGCAGGCTACAG      | GGGCTTCATTTCTGTCCAGC     |
| $\beta$ -actin | CATCCGTAAAGACCTCTATGCCAAC | ATGGAGCCACCGATCCACA      |
| <i>Gapdh</i>   | AGGTCGGTGTGAACGGATTTG     | TGTAGACCATGTAGTTGAGGTCA  |
| miR-23b-3p     | GGCAGACAATCACATTGCCA      | TATGGTTGTTACGACTCCTTCAC  |
| miR-27b-3p     | CTCGTCAATTCACAGTGGCTAAG   | TATGGTTTTGACGACTGTGTGAT  |
| miR-24-3p      | CCGGTGCCTACTGAGCTGATAT    | TATCCTTCTTCACGACTCCTTCAC |
| U6             | CAGCACATATACTAAAATTGGAACG | ACGAATTTGCGTGTCATCC      |
