# Supplementary material for: Loss of miR-23b/27b/24-1 Cluster Impairs Glucose Tolerance via Glycolysis Pathway in Mice
Source: Int J Mol Sci. 2021 Jan 7;22(2):550. doi: 10.3390/ijms22020550 (PMC7826568; doi:10.3390/ijms22020550)
Supplement: Supplementary file 1 [file ijms-22-00550-s001.zip]

Archive with 4 entries (4 files):
- ijms-1024855-suppl.-proof checked V2.pdf
- table S2.xlsx
- table S3.xlsx
- table S4.xlsx
