# Supplementary material for: Loss of miR-23b/27b/24-1 Cluster Impairs Glucose Tolerance via Glycolysis Pathway in Mice
Source: Int J Mol Sci. 2021 Jan 7;22(2):550. doi: 10.3390/ijms22020550 (PMC7826568; doi:10.3390/ijms22020550)
Supplement: Supplementary file 1 [file ijms-22-00550-s001.zip › table S2.xlsx]

## Sheet: sheet1
Name	log2FC	FC	Pvalue
L-Dopa	-0.415205	0.749913	0.000436026
Histamine	0.36466	1.28758	0.00136932
Epigallocatechin	-0.605589	0.657203	0.00174623
XLR11 N-(4-hydroxypentyl) metabolite	1.1848	2.27332	0.00856821
FAHFA (14:0/16:2)	0.747528	1.67891	0.00925177
ACar 20:4	0.443682	1.36007	0.00961201
Porphobilinogen	-0.464645	0.724649	0.0105237
2-(carboxymethoxy)-4-methoxybenzoic acid	-0.506423	0.703966	0.0126056
N-Acetylmethionine	-0.323272	0.799255	0.0131225
L-(-)Histidinol	-1.11429	0.461918	0.0143102
Phosphoric acid	-0.219968	0.858584	0.0159224
PC (20:5e/2:0)	0.707513	1.63299	0.0159819
Artemisinin	-1.18241	0.440616	0.0167687
LPE 22:5	0.603385	1.51928	0.0177844
16,16-Dimethyl prostaglandin A1	1.1416	2.20625	0.0186158
nor-6β-Oxycodol	-0.709621	0.611481	0.0189424
5α-Tetrahydrocortisol	1.36713	2.57957	0.0220852
L-Cysteine-glutathione gisulfide	-1.00539	0.498135	0.0221779
LPI 18:3	-1.15189	0.450036	0.0239208
N-Acetyl-L-glutamine	-0.457019	0.72849	0.0243502
3-[4-(tert-butyl)anilino]-2-(3-thienylcarbonyl)acrylonitrile	-0.658825	0.633394	0.026757
diethyl 2-{[2-(2-thienylcarbonyl)hydrazino]methylidene}malonate	-0.542556	0.686553	0.0279403
FAHFA (18:1/3:0)	0.802142	1.74369	0.0282345
L-Saccharopine	-0.88951	0.539797	0.0286099
Retinoic acid	0.338749	1.26466	0.02907
Cortisol	1.15533	2.22735	0.0294048
Taurine	0.549849	1.46393	0.0299159
3-[(methoxycarbonyl)amino]-2,2,3-trimethylbutanoic acid	-0.501888	0.706182	0.0301477
L-Pyroglutamic acid	-0.63804	0.642586	0.0305192
8-Iso-15-keto-prostaglandin-F2β	-1.7387	0.29964	0.0308606
1-Methylguanine	-0.910728	0.531916	0.0320095
LPC 18:3	-1.49475	0.354843	0.0321366
3-[4-methyl-1-(2-methylpropanoyl)-3-oxocyclohexyl]butanoic acid	0.310331	1.23999	0.0340891
Methylimidazoleacetic acid	0.589244	1.50446	0.0358057
Isovalerylglycine	-0.812409	0.56943	0.0358791
13,14-Dihydro-15-keto Prostaglandin A2	-0.180378	0.882472	0.0360858
D-Cysteine	-0.762398	0.589515	0.0366506
Cysteinylglycine	-0.16037	0.894795	0.0374232
Coenzyme A	-0.434599	0.739899	0.0389775
N8-Acetylspermidine	0.888063	1.85069	0.0393372
2-(tert-butyl)-1,3-thiazolane-4-carboxylic acid	0.889106	1.85203	0.0393837
Nor-9-carboxy-δ9-THC	0.770752	1.70616	0.0408892
Desoxycortone	0.942075	1.92129	0.0433159
Hydrocortisone	-0.658088	0.633718	0.0439721
PC (6:0/16:4)	0.782866	1.72055	0.0443624
OxPC (16:0-20:4+3O(2Cyc))	2.08343	4.23814	0.0469852
Adrenic acid	1.03837	2.05391	0.0491997
Vanillin	-0.207462	0.86606	0.0501855
Xanthosine	-0.712799	0.610135	0.050323
Lysops 22:6	-0.576562	0.67056	0.0509502
Hydrocortisone 17-valerate	0.736548	1.66618	0.052156
ACar 17:1	0.816679	1.76135	0.0523355
Kojic acid	0.363998	1.28699	0.0534622
N-lactoyl-phenylalanine	-0.444702	0.734736	0.053932
Tetrahydrocorticosterone	1.04847	2.06834	0.0542385
3-Methoxyflavone	-0.422132	0.746321	0.0554832
(2E,4E)-N-[2-(4-hydroxyphenyl)ethyl]dodeca-2,4-dienamide	0.56251	1.47684	0.0564628
PC (2:0/13:0)	-1.77491	0.292213	0.0577715
R-1 Methanandamide phosphate	-0.787528	0.579336	0.0586505
4,4'-dimethoxy[1,1'-biphenyl]-2-carbonitrile	-0.698594	0.616172	0.0606972
3-Methylcrotonylglycine	-1.02801	0.490386	0.0607848
Kahweol	-0.805838	0.57203	0.0630027
Epitestosterone	0.833756	1.78232	0.0631021
Diacetoxyscirpenol	0.481298	1.396	0.063178
N-Isobutyrylglycine	-0.789511	0.57854	0.0658431
Cuminaldehyde	-0.255827	0.837507	0.067136
ethyl 4-methyl-2-(1H-pyrrol-1-yl)-1,3-thiazole-5-carboxylate	-0.203137	0.86866	0.0701499
Phosphoenolpyruvic acid	-0.298107	0.813319	0.0737067
3-O-β-D-Glucopyranosylandrographolide	-0.910206	0.532109	0.0751746
(5ξ,9ξ)-17-Hydroxykaur-15-en-19-oic acid	0.653848	1.57336	0.0753505
gamma-Muurolene	-0.427328	0.743638	0.0755997
Guggulsterone	0.726837	1.65501	0.0779929
PC (2:0/16:1)	-0.552493	0.681841	0.0800173
4-oxo-5-phenylpentanoic acid	-0.866761	0.548377	0.0804956
6-Phosphogluconic acid	-0.454483	0.729772	0.0810696
Guanosine monophosphate (GMP)	-0.179612	0.88294	0.0812822
N1-[2-(methylthio)-6-(trifluoromethoxy)phenyl]-2,2-dimethylpropanamide	-0.382119	0.76731	0.0843609
9-Hpode	0.885048	1.84683	0.0845136
(6E)-7-(2H-1,3-benzodioxol-5-yl)-1-(piperidin-1-yl)hept-6-en-1-one	0.442919	1.35935	0.0847443
N1-[4-hydroxy-6-(methoxymethyl)pyrimidin-2-yl]acetamide	-0.308651	0.807397	0.085999
4-{3-[(3,4-dihydroxyphenyl)methyl]-2-methylbutyl}benzene-1,2-diol	-0.546912	0.684484	0.0872772
morphine-d3	2.08911	4.25484	0.0884739
Hydrocortisone 21-acetate	-0.475699	0.719118	0.088573
4-Methoxycinnamaldehyde	-0.99706	0.50102	0.0890477
(+)-ar-Turmerone	0.196408	1.14584	0.0897748
N-Acetylglycine	-0.651773	0.636498	0.090668
6-(tert-butyl)thieno[3,2-d]pyrimidin-4(3H)-one	0.551353	1.46546	0.0914773
N-Acetylneuraminic acid	-0.836402	0.560038	0.0918509
Inosine-5'-monophosphate (IMP)	-0.745539	0.596445	0.0929291
ACar 22:5	0.741735	1.67219	0.0929922
N-Acetyl-D-alloisoleucine	-0.474216	0.719858	0.0934953
Reduced nicotinamide adenine dinucleotide	-1.36327	0.3887	0.0962089
Cantharidin	-0.627998	0.647074	0.0965199
Imidazolelactic acid	-0.39382	0.761112	0.0986844
5-trans prostaglandin F2β	0.542725	1.45672	0.0987876
LPS 20:5	-0.320876	0.800584	0.099865
Asp-Phe methyl ester	-0.423406	0.745662	0.101007
Tetrahydrobiopterin	-0.281276	0.822863	0.101671
N-Isovalerylglycine	-1.39708	0.379696	0.105038
L-Glutathione oxidized	-0.580879	0.668557	0.107543
Prolylleucine	-0.348286	0.785517	0.108959
FAHFA (22:6/16:0)	0.405895	1.32491	0.111288
Dl-4-Hydroxy-3-methoxymandelie acid	0.594832	1.5103	0.112033
LPC 16:0	-0.527889	0.693569	0.112526
LPC 18:5	-0.273224	0.827468	0.112592
L-(+)-Lactic acid	-0.306479	0.808613	0.114101
LPC 20:2	0.355485	1.27942	0.115676
2-[5-(2-hydroxypropyl)oxolan-2-yl]propanoic acid	-0.507425	0.703477	0.116306
ACar 17:0	0.619452	1.53629	0.117112
Glycine	-0.478585	0.717681	0.118083
trans-Cinnamaldehyde	-0.185779	0.879174	0.119367
Choline	-0.239803	0.846861	0.119754
Milbemectin A3	-0.808561	0.570951	0.121476
Lysopc 18:3	0.493217	1.40758	0.123347
Jasmonic acid	-0.385173	0.765687	0.124572
ACar 19:1	1.01617	2.02254	0.124847
1-(4-fluorophenyl)-2-(4-methoxyphenyl)-4-(2-naphthyl)butane-1,4-dione	-1.22937	0.426503	0.124915
3,4-dihydro-2H-benzo[4,5]imidazo[2,1-b][1,3]thiazin-3-ol	0.529268	1.4432	0.12616
1,7,8-trihydroxy-3-methyl-1,2,3,4,7,12-hexahydrotetraphen-12-one	0.984222	1.97825	0.126342
PC (18:4e/2:0)	0.187398	1.13871	0.126735
Deoxycholic acid	-0.918407	0.529093	0.128352
N-Tigloylglycine	-1.05892	0.479992	0.1294
Cannabigerolic acid	-0.156966	0.896909	0.132718
FAHFA (16:0/20:2)	0.608921	1.52512	0.132965
L-Cysteinylglycine	-0.269986	0.829328	0.134189
1-(4-hydroxyphenyl)propane-1,2-diol	-0.329052	0.79606	0.135243
PC (18:3e/2:0)	0.475354	1.39026	0.135926
Acetyl-L-carnitine	0.852987	1.80624	0.136068
Creatine	-0.0830318	0.944072	0.140318
N1-(2,3-dihydro-1,4-benzodioxin-2-ylmethyl)-2,2-dimethylpropanamide	1.98888	3.96929	0.14059
5-Dehydroquinic acid	-0.506598	0.70388	0.140722
Epinephrine	-0.242441	0.845314	0.141507
α-Linolenoyl ethanolamide	0.316316	1.24515	0.141664
Glycerophospho-N-palmitoyl ethanolamine	0.520009	1.43396	0.141772
ACar 15:1	0.347468	1.27233	0.142477
4-Pregnen-17α,20α-Diol-3-One	-0.527387	0.69381	0.145307
Xanthine	-0.584272	0.666986	0.146356
Cholic acid	-1.61361	0.326779	0.147371
PC (17:1/17:2)	-0.963269	0.512894	0.147846
Kynurenic acid	-0.544331	0.685709	0.148034
LPC 18:2	-0.376151	0.77049	0.148061
L-(+)-Citrulline	-0.626434	0.647775	0.149172
Tetrahydrocortisone	0.632418	1.55016	0.150861
Xanthurenic acid	-0.512937	0.700794	0.154683
N-{4-[1-cyano-2-(4-pyridyl)vinyl]phenyl}urea	-0.332971	0.7939	0.154898
D-(+)-Proline	-0.258889	0.835731	0.154911
5-Hydroxyindole	0.777743	1.71445	0.156141
5-Hydroxylysine	0.975286	1.96603	0.15883
N-[3-(aminosulfonyl)phenyl]-2,3-dihydro-1,4-benzodioxine-2-carboxamide	-0.496833	0.708661	0.159103
(9cis)-Retinal	-0.365916	0.775976	0.162138
ACar 21:2	0.834491	1.78323	0.162314
LPC 16:1	-0.675216	0.626238	0.167451
4-Ethylbenzaldehyde	-0.653389	0.635785	0.167518
(2R)-2-[(2R,5S)-5-[(2S)-2-hydroxybutyl]oxolan-2-yl]propanoic acid	1.27371	2.41782	0.167982
γ-Linolenic acid ethyl ester	0.477808	1.39263	0.168315
7-Methyluric Acid	-0.394963	0.760509	0.170415
3-hydroxy-3-methylpentanedioic acid	0.229898	1.17275	0.171062
Cholecalciferol	-0.830462	0.562349	0.171478
N-Acetylhistidine	-0.449849	0.732119	0.174432
L-Cysteinesulfinic acid	2.82103	7.06666	0.175603
Estazolam	-0.68495	0.622028	0.17637
16α-Hydroxydehydroepiandrosterone	2.02409	4.06734	0.177703
2-{2-[4-(tert-butyl)phenyl]-4-hydroxy-1,3-thiazol-5-yl}acetic acid	-0.287906	0.81909	0.178768
LPA 18:2	0.768612	1.70363	0.1791
Methionine sulfoxide	-0.208246	0.865589	0.180466
7α-Hydroxytestosterone	-0.212283	0.863171	0.180772
acetyl phospahte	0.228869	1.17192	0.182865
2-hydroxy-6-[(8Z,11Z)-pentadeca-8,11,14-trien-1-yl]benzoic acid	-0.277324	0.82512	0.182928
2-Methylbutyroylcarnitine	-1.00506	0.498248	0.185873
Tetrahydroaldosterone	0.710068	1.63588	0.186038
FAHFA (20:4/20:3)	0.338629	1.26455	0.187024
6β-Naloxol	-0.521527	0.696634	0.187306
Creatinine	-0.123981	0.917652	0.189543
Verbascose	0.715234	1.64175	0.19065
Thr-Leu	0.330962	1.25785	0.190685
Docosapentaenoic acid	0.43911	1.35577	0.190969
FAHFA (18:2/17:0)	0.483613	1.39824	0.191491
2,6-Dimethyl-γ-pyrone	-0.656837	0.634267	0.192335
FAHFA (18:0/20:0)	0.608755	1.52494	0.192464
17alpha-Hydroxyprogesterone	-0.646087	0.639011	0.19369
1,2-dihydroxyheptadec-16-yn-4-yl acetate	-0.856472	0.552301	0.19509
Salvinorin B	0.477984	1.3928	0.195212
Uric acid	-0.527415	0.693797	0.195665
Hypoxanthine	-0.210342	0.864332	0.196823
Thymine	-0.569015	0.674077	0.197074
PC (19:2/20:5)	-0.61734	0.651872	0.198048
3-(3,4-Dihydroxyphenyl)-2-Methylalanine	-0.633494	0.644613	0.198083
ACar 14:2	0.582493	1.49743	0.199336
all-cis-4,7,10,13,16-Docosapentaenoic acid	0.281753	1.21567	0.199392
LPE 22:4	-0.708896	0.611788	0.199545
LPS 22:6	-0.453865	0.730084	0.199999
3-[(4-hydroxyphenyl)methyl]-octahydropyrrolo[1,2-a]pyrazine-1,4-dione	1.19242	2.28535	0.202241
PA (18:1/20:4)	0.679464	1.60155	0.202612
FAHFA (22:5/18:1)	0.594101	1.50953	0.203339
Dehydroascorbic acid	-0.605899	0.657062	0.203439
Isoamylamine	1.58482	2.9997	0.205603
5-(2-chloro-6-fluorobenzyl)-6-methyl-2-morpholinopyrimidin-4-ol	-0.783437	0.580981	0.205843
pentane-1,2,3,4,5-pentol	-0.139421	0.907884	0.20599
Υ-L-Glutamyl-L-glutamic acid	-0.453102	0.730471	0.207453
N-(9-oxodecyl)acetamide	2.03724	4.1046	0.208817
PC (18:0/20:4)	-1.02911	0.490012	0.209241
Isorhapontigenin	-0.671556	0.627829	0.209483
Maltotetraose	0.693719	1.61745	0.211478
LPE 18:2	-0.180558	0.882362	0.212687
N2-tetrahydrofuran-2-ylmethyl-4-(4-fluorophenyl)-1,3-thiazol-2-amine	-0.740132	0.598685	0.212795
Dihomo-γ-linolenic acid ethyl ester	0.610296	1.52657	0.212892
L-Norleucine	-0.364896	0.776525	0.213102
Citric acid	-0.393687	0.761182	0.213298
Glycerol 3-phosphate	-0.164163	0.892446	0.213632
2-Acetamido-N-β-aspartyl-2-deoxyhexopyranosylamine	-0.548753	0.683611	0.220294
Spermidine	0.326929	1.25434	0.221331
γ-Linolenic acid	-0.189263	0.877054	0.22219
N3,N4-Dimethyl-L-arginine	-0.383007	0.766838	0.222362
Inositol	-0.107689	0.928073	0.222399
N-Acetylcysteine	-1.01703	0.494132	0.222927
Oleoyl ethylamide	0.650458	1.56967	0.223152
1-adamantyl(piperidino)methanone	0.540339	1.45431	0.224272
N1-[1-(2,4-dimethylphenyl)ethyl]-2,2-dimethylpropanamide	0.633067	1.55086	0.224769
11(Z),14(Z)-Eicosadienoic acid	0.470487	1.38558	0.225307
Gamma-Glu-Leu	1.56113	2.95085	0.226728
FAHFA (18:1/18:0)	0.329047	1.25618	0.230879
N-{4-methyl-3-[(2-toluidinocarbothioyl)amino]phenyl}methanesulfonamide	-0.287652	0.819234	0.231489
DL-Serine	0.328771	1.25594	0.231652
L-Tyrosine	-0.605426	0.657277	0.231714
3-Hydroxydecanoic acid	-0.441913	0.736158	0.231988
ACar 20:3	0.433188	1.35021	0.232592
PC (20:2/20:3)	-0.274802	0.826564	0.232732
Octyl hydrogen phthalate	0.23456	1.17655	0.233817
PE (16:1/22:6)	-0.778108	0.583131	0.234025
FAHFA (16:0/2:0)	0.202896	1.15101	0.235083
Glycoursodeoxycholic acid	-1.14738	0.451446	0.235183
Asparagine	-0.147745	0.90266	0.236553
Thymidine	-0.587337	0.66557	0.236883
Venlafaxine N-Oxide	1.25481	2.38636	0.237024
Ethyl-β-D-glucuronide	0.453835	1.36968	0.237071
1-(6-methyl-3-pyridyl)ethan-1-one O1-ethyloxime hydrochloride	0.20382	1.15174	0.238698
2-Hydroxycinnamic acid	-0.588771	0.664909	0.23921
PC (16:1e/4:0)	0.498187	1.41244	0.240136
13,14-Dihydro-15-keto Prostaglandin J2	-0.499982	0.707116	0.240308
10-Nitrolinoleate	2.11195	4.32274	0.241486
ACar 20:1	0.857392	1.81176	0.242212
5,5-dimethyl-3-morpholinocyclohex-2-en-1-one	1.42102	2.67775	0.242625
PC (7:0/8:0)	-0.0802893	0.945868	0.244466
2-Methoxybenzaldehyde	-0.488692	0.712671	0.244594
Glu-Val-Phe	1.35405	2.55629	0.24541
1-(3-ethyl-2,4-dihydroxy-6-methoxyphenyl)butan-1-one	1.32545	2.50611	0.247869
PC (16:2e/2:0)	-0.124478	0.917336	0.248396
PC (16:0e/2:0)	0.629318	1.54683	0.249745
FAHFA (20:4/18:1)	0.220731	1.16532	0.249997
7-(1-pyrrolidinyl)pyrimido[4,5-d]pyrimidin-4-amine	-0.116477	0.922437	0.250416
ACar 20:2	0.779227	1.71621	0.250836
PE (20:3/20:3)	-0.64361	0.640109	0.251348
LPE 18:0	0.585544	1.5006	0.25236
Guanidinosuccinic acid	0.548195	1.46225	0.252438
1-(6-hydroxy-4,7-dimethoxybenzo[b]furan-5-yl)ethan-1-one	-0.342405	0.788725	0.253399
N-Desmethylclobazam	-0.399025	0.758371	0.2544
Stachyose	0.572283	1.48687	0.255271
Aripiprazole	-0.330725	0.795137	0.256684
LPC 14:0	0.211242	1.15768	0.257631
Eicosapentaenoic acid ethyl ester	0.743443	1.67417	0.258369
ACar 22:4	0.58941	1.50463	0.260464
Cytidine	-0.293307	0.816029	0.261676
PG (16:1/18:2)	0.712071	1.63815	0.262574
N-[2-chloro-6-(trifluoromethoxy)phenyl]-2,2-dimethylpropanamide	-0.416479	0.749251	0.263071
α,α-Trehalose	-0.525902	0.694525	0.263331
15-Deoxy-Δ12,14-prostaglandin A1	0.348975	1.27366	0.264198
Gly-Val	0.486124	1.40068	0.265773
Tau-Methylhistidine	0.198302	1.14735	0.267782
PC (4:0/16:2)	0.630812	1.54844	0.267798
PG (16:1/20:4)	0.684683	1.60735	0.267906
acridine-9(10H)-thione	-0.33874	0.790732	0.268701
Lysopc 18:1	0.164145	1.1205	0.269997
7-Ketocholesterol	0.554828	1.46899	0.271045
(2E,4E)-N-(2-methylpropyl)dodeca-2,4-dienamide	0.498415	1.41266	0.272175
Toradol	-0.227887	0.853885	0.272508
Thiazolidine-4-carboxylic acid	3.0054	8.03	0.274473
Phytosphingosine	0.486098	1.40065	0.274861
FAHFA (3:0/24:4)	-0.364167	0.776917	0.275535
Capryloylglycine	-0.537979	0.688735	0.277756
LPE 17:1	0.355116	1.27909	0.277909
Hydroxypyruvic acid	1.27421	2.41866	0.278369
SM (d28:3/14:0)	0.189888	1.14068	0.278886
12-Hydroxydodecanoic acid	-0.330762	0.795116	0.280195
11-Deoxy prostaglandin F2β	-0.33563	0.792438	0.280819
PC (18:5e/22:3)	-0.0925024	0.937895	0.281474
Boldione	-0.43103	0.741732	0.282097
2-Anisic acid	-0.326213	0.797628	0.282479
Tetranor-12(S)-HETE	0.296046	1.22777	0.283031
2-Methylsuccinic Acid	0.254559	1.19297	0.284448
Uridine	-0.46071	0.726629	0.284937
Uridine 5'-diphosphoglucuronic acid	-0.364895	0.776525	0.28573
PC (20:4/22:6)	1.71588	3.28496	0.286219
Oleamide	0.502714	1.41688	0.288021
N-Oleoyl Glycine	0.204877	1.15259	0.289034
Daidzein	1.39037	2.62146	0.289217
LPI 20:5	-0.188198	0.877701	0.289281
LPI 17:1	-0.458321	0.727833	0.289305
4-Phenyl-3-buten-2-one	-0.310512	0.806356	0.291315
Ribitol(Adonitol)	-0.264978	0.832212	0.29179
Ciprostene	0.90941	1.87828	0.293555
Indirubin	-0.328646	0.796283	0.294254
S-Lactoyglutathione	-0.247545	0.842328	0.294334
LPC 20:1	0.534654	1.44859	0.29434
3-amino-2-phenyl-2H-pyrazolo[4,3-c]pyridine-4,6-diol	-0.713038	0.610034	0.294378
Asp-Phe	0.692994	1.61664	0.295241
Ornithine	-0.215832	0.86105	0.295971
PC (19:2/19:2)	-1.37035	0.386796	0.298253
Vesamicol	0.694689	1.61854	0.298483
Uridine 5'-diphosphate (UDP)	-0.309514	0.806914	0.299865
Cytidine 5'-monophosphate (hydrate)	-0.392764	0.761669	0.30036
ACar 18:1	0.633524	1.55135	0.300829
FAHFA (20:4/22:5)	0.286484	1.21966	0.301251
Gluconic acid	-0.191351	0.875785	0.302704
PC (18:5e/2:0)	-0.138745	0.908309	0.302754
3-Hydroxy-4-methoxyphenylacetic acid	-0.915413	0.530192	0.302938
Gly-Tyr	-0.792699	0.577263	0.303234
Docosatrienoic acid	0.572822	1.48743	0.305318
(2E,4E)-N-(2-methylpropyl)deca-2,4-dienamide	0.451249	1.36722	0.306305
Fenpropimorph	0.440752	1.35731	0.307252
(R)-3-Hydroxy myristic acid	-0.216007	0.860945	0.307483
4-Phenylbutyric acid	-0.370281	0.773632	0.307892
7-(2-hydroxypropan-2-yl)-1,4a-dimethyl-decahydronaphthalen-1-ol	0.441526	1.35804	0.308413
PG (20:3/22:6)	0.649814	1.56897	0.30843
Ecgonine methyl ester	-0.252252	0.839585	0.308473
DL-Stachydrine	0.869952	1.8276	0.309485
L-Kynurenine	-0.467681	0.723126	0.310243
o-Cresol	-0.113367	0.924428	0.310854
PC (22:6e/18:5)	-0.372394	0.772499	0.311959
N2-neopentyl-5-methyl-1,3,4-thiadiazol-2-amine	-0.269763	0.829456	0.312108
Dinophysistoxin-2	-0.0777039	0.947565	0.312841
Sepiapterin	0.495137	1.40945	0.314503
6α-Naltrexol	-0.348043	0.785649	0.314957
Gamithromycin	-0.442007	0.73611	0.31578
Dihydrothymine	0.420868	1.33873	0.31629
Stearamide	0.58694	1.50206	0.316372
9-Hydroxy-(10E,12Z,15Z)-Octadecatrienoic Acid	-0.265162	0.832105	0.317747
Maltotriose	0.41097	1.32958	0.318465
Estriol	-0.352776	0.783076	0.319194
DL-5-Methoxytryptophan	0.128753	1.09335	0.32074
PG (16:1/22:6)	0.65172	1.57104	0.321291
PG (20:5/22:6)	1.01447	2.02017	0.321906
O-Arachidonoyl ethanolamine	0.292259	1.22456	0.324412
7,8 dihydrofolate	-0.440225	0.73702	0.325215
N-Acetyl-L-leucine	-0.227247	0.854263	0.32608
Arachidonic acid	0.152529	1.11152	0.32721
Indole	-0.215889	0.861015	0.32737
Taurochenodeoxycholate	-0.351183	0.783941	0.327478
PG (18:1/18:1)	0.603396	1.51929	0.327758
Methylmalonic Acid	0.221828	1.16621	0.328106
Normorphine	-0.81667	0.567751	0.328369
LPA 16:0	-0.338264	0.790993	0.329595
O-Phosphorylethanolamine	-0.24073	0.846317	0.330285
Lysopg 18:1	2.07586	4.21595	0.330347
11β-Prostaglandin F2α	-0.415533	0.749743	0.330604
Acetyl-β-methylcholine	0.256634	1.19469	0.331218
LPE 20:3	0.286725	1.21987	0.332622
5'-S-Methyl-5'-thioadenosine	0.235113	1.177	0.334311
PG (18:2/20:4)	0.687846	1.61088	0.335689
FAHFA (16:1/18:3)	0.181051	1.13371	0.33688
LPG 18:0	0.524598	1.43853	0.339037
S-Methyl-5'-thioadenosine	-0.271038	0.828723	0.339984
Methionine	0.269222	1.20516	0.340009
S-Adenosylmethionine	0.303093	1.23379	0.340401
(+/-)12(13)-DiHOME	-0.228462	0.853544	0.341231
LPG 20:5	0.413937	1.33232	0.342901
Indole-5-Carboxylic Acid (98%)	-0.348981	0.785138	0.345774
FAHFA (22:4/18:0)	0.382473	1.30357	0.345881
Mono(2-ethylhexyl) phthalate (MEHP)	1.08792	2.12567	0.346225
(2R,3S,4S,5R,6R)-2-(hydroxymethyl)-6-(2-phenylethoxy)oxane-3,4,5-triol	-0.163242	0.893016	0.346423
Elaidic acid	0.185568	1.13726	0.346595
2-Phenylacetamide	-0.595445	0.66184	0.347991
LPS 18:0	0.482255	1.39693	0.348311
4-Oxoproline	-0.326737	0.797338	0.349184
Proline-hydroxyproline	0.462719	1.37814	0.349776
LPG 22:4	0.27088	1.20654	0.350001
trans,trans-2,4-Heptadienal	0.333882	1.2604	0.351148
Docosahexaenoic acid	-0.297392	0.813722	0.35129
PG (18:2/22:6)	0.625597	1.54285	0.351636
5-(2,5-dihydroxyhexyl)oxolan-2-one	-2.17615	0.221265	0.353389
Isoquinoline	0.143724	1.10475	0.354165
N-Acetyl-α-D-glucosamine 1-phosphate	-0.150553	0.900905	0.355263
1-Methylguanidine	0.413341	1.33177	0.35541
N2-Methylguanosine	-0.238475	0.847641	0.360593
3,3-Dimethylglutaric acid	-0.117886	0.921537	0.360697
Adenosine 5'-monophosphate	0.112074	1.08078	0.362069
Lysopc 18:2	-0.450961	0.731555	0.36304
U-47700-d6	-0.102748	0.931257	0.363072
22(S)-Hydroxycholesterol	-0.541553	0.687031	0.36364
ACar 18:0	0.511205	1.42524	0.364439
DL-2-(acetylamino)-3-phenylpropanoic acid	0.173685	1.12794	0.365459
Pyridine	-0.229576	0.852885	0.365753
Oxohongdenafil	0.494754	1.40908	0.36607
Mesaconic acid	0.536003	1.44995	0.366375
Pregnenolone	0.130658	1.09479	0.366396
Dl-Lanthionine	0.569904	1.48442	0.366853
Pyridoxal 5'-phosphate	-0.250895	0.840375	0.369353
N-[4-chloro-2-(2-chlorobenzoyl)phenyl]-2-(4-methylpiperidino)acetamide	-1.30639	0.404332	0.374924
Flavin mononucleotide (FMN)	0.239099	1.18026	0.375439
PG (18:3/22:6)	0.694078	1.61785	0.375529
6β-Prostaglandin I1	0.478493	1.39329	0.376771
Lauric acid ethyl ester	0.0793564	1.05655	0.376922
Hexanoylglycine	-0.477112	0.718414	0.377273
Thromboxane B2	0.338908	1.2648	0.377998
Anandamide (AEA)	0.454523	1.37033	0.379682
3-benzyl-1-butyl-4-hydroxy-1,2-dihydroquinolin-2-one	-0.471977	0.720976	0.379779
D-Fructose 6-Phosphate-Disodium Salt	0.320527	1.24879	0.380132
11,12-Epoxy-(5Z,8Z,11Z)-icosatrienoic acid	-0.230967	0.852064	0.380258
5-(tert-butyl)-N-[4-(trifluoromethyl)phenyl]thiophene-2-carboxamide	-0.151178	0.900515	0.380264
D-Sphingosine	0.490083	1.40453	0.380381
PC (2:0/18:3)	-0.254775	0.838118	0.380435
LPG 18:2	-0.155119	0.898058	0.381445
Ginkgoic acid	0.306569	1.23676	0.38166
Cytidine 5'-diphosphocholine	-0.12174	0.919078	0.382772
Oleoyl ethanolamide	0.266456	1.20285	0.383058
Taurochenodesoxycholic Acid	-0.18887	0.877293	0.383113
D-Glucose 6-phosphate	0.296582	1.22823	0.383499
7-Methylguanine	-0.43736	0.738485	0.383825
LPE 18:1	0.260086	1.19755	0.385239
Sedanolide	0.137778	1.10021	0.385245
2-Amino-1,3-octadecanediol	0.533498	1.44743	0.385776
5-[(8Z,11Z)-pentadeca-8,11-dien-1-yl]benzene-1,3-diol	0.18176	1.13427	0.387311
PC (18:1/18:2)	-0.291084	0.817288	0.387918
S-Adenosylhomocysteine	-0.177432	0.884276	0.388044
Physostigmine	0.307209	1.23731	0.390288
L-Histidine	-0.668815	0.629023	0.39092
2,4-dihydroxyheptadec-16-en-1-yl acetate	0.353266	1.27745	0.391301
GMP	0.197782	1.14693	0.391937
L-Gulonic-Γ-Lactone	0.462983	1.37839	0.392786
Nicotinamide	-0.127018	0.915722	0.393631
Υ-Aminobutyric acid (GABA)	-0.184452	0.879983	0.393643
Uridine monophosphate (UMP)	-0.0872872	0.941291	0.393813
Succinic acid	-0.178473	0.883638	0.39447
α-ketoisovaleric acid	-0.244823	0.843919	0.395287
N-Methylisoleucine	-0.121385	0.919305	0.396734
Dehydroepiandrosterone (DHEA)	-0.062279	0.95775	0.398629
17α-Methyl-androstan-3-hydroxyimine-17β-ol	0.226791	1.17023	0.401705
ACar 22:1	0.703843	1.62884	0.401878
Guanine	-0.188538	0.877494	0.402051
Adenosine diphosphate (ADP)	-0.303855	0.810085	0.402282
N-Tetradecanamide	0.269631	1.2055	0.403865
DL-3,4-Dihydroxyphenyl glycol	-0.47873	0.717609	0.404
Nervonic acid	0.363104	1.28619	0.406239
Dulcitol	0.284519	1.218	0.406751
5β-Androstan-17β-ol-3-one	0.121806	1.0881	0.407239
Menaquinone	0.250364	1.18951	0.409299
Lysope 14:0	0.188086	1.13925	0.409492
LPA 12:0	-0.169605	0.889086	0.409976
5-(6-hydroxy-6-methyloctyl)-2,5-dihydrofuran-2-one	0.185495	1.13721	0.410418
PC (14:0e/2:0)	0.105023	1.07551	0.410961
Glycocholic acid	-0.30365	0.8102	0.411186
D-Homocysteine	-0.457812	0.72809	0.411895
Indole-3-acetic acid	0.0717357	1.05098	0.412475
13-Hpotre(R)	-0.322047	0.799934	0.413797
Taurochenodeoxycholic acid	-0.437431	0.738448	0.414348
LPG 22:5	0.235707	1.17748	0.414825
L-Threonic acid	-0.272656	0.827794	0.416173
Fexofenadine	-0.352715	0.783109	0.417308
20-Hydroxy-(5Z,8Z,11Z,14Z)-eicosatetraenoic acid	-0.196659	0.872569	0.417614
2-Isopropylaniline	0.14185	1.10332	0.420422
11-Oxoetiocholanolone	0.563925	1.47829	0.421932
FAHFA (18:2/18:1)	0.0883837	1.06318	0.423286
Ala-Leu	0.291534	1.22394	0.426561
LPI 20:4	-0.0783956	0.94711	0.426673
PC (20:5e/22:6)	0.482246	1.39692	0.428107
D-Alanyl-D-alanine	0.422331	1.34009	0.428879
Trigonelline	0.619964	1.53684	0.429501
gamma-Glutamylleucine	0.374341	1.29625	0.429772
Phosphoethanolamine	-0.256068	0.837367	0.429897
7-Hydroxycoumarinyl-γ-linolenate	1.10065	2.14452	0.431506
N-Methyllysine	0.244446	1.18464	0.431613
LPA 18:0	0.334	1.2605	0.431666
PE (20:3/20:4)	1.31014	2.47966	0.432662
Flavin adenine dinucleotide (FAD)	-0.140446	0.907238	0.43308
4-(tert-butyl)phenyl 3,5-dimethylisoxazole-4-carboxylate	-0.313716	0.804566	0.433425
LPI 18:0	0.305826	1.23613	0.4339
16,16-Dimethyl prostaglandin A2	0.748192	1.67969	0.434327
LPE 20:1	0.287426	1.22046	0.436078
PG (22:6/22:6)	0.550575	1.46467	0.436492
Diosgenin	0.221676	1.16609	0.437652
PEtOH (16:0-20:4)	0.270951	1.2066	0.437691
2-Amino-1,3,4-octadecanetriol	0.184925	1.13676	0.438601
PC (18:1/22:6)	-0.243818	0.844507	0.439184
p-Mentha-1,3,8-triene	0.242152	1.18276	0.439569
Ascorbic acid	-3.29493	0.101889	0.440052
Muramic acid	-0.132195	0.912442	0.441612
Medroxyprogesterone	-0.296315	0.81433	0.442118
gamma-Glutamyltyrosine	0.516325	1.43031	0.442922
PC (18:3e/22:6)	0.330647	1.25758	0.444342
Lysopa 16:0	-0.456802	0.728599	0.444614
ACar 16:1	0.412968	1.33142	0.445496
6-Methylnicotinamide	0.265449	1.20201	0.448002
PC (17:0/18:2)	-0.504566	0.704872	0.448685
Adenosine diphosphate ribose	-0.186564	0.878696	0.448776
D-Glucosamine 6-phosphate	-0.362679	0.777719	0.449208
Acetylcarnitine	-0.161537	0.894072	0.449899
Sn-Glycero-3-Phosphocholine	-0.0950625	0.936232	0.452662
15-Deoxy-Δ12,14-prostaglandin J2-2-glycerol ester	-0.27343	0.82735	0.45473
2-(2-acetyl-3,5-dihydroxyphenyl)acetic acid	-0.638439	0.642408	0.45476
Docosahexanoic acid	-0.0893863	0.939922	0.454953
UDP-N-acetylglucosamine	0.133195	1.09672	0.455437
5,6-dimethyl-4-oxo-4H-pyran-2-carboxylic acid	0.192024	1.14237	0.455976
2-(14,15-Epoxyeicosatrienoyl) glycerol	-0.570564	0.673353	0.457102
Guanosine	-0.520457	0.697151	0.461005
LPS 18:2	-0.142187	0.906145	0.461105
Glycitein	1.28639	2.43916	0.461427
(3β,9ξ)-3,14-Dihydroxycarda-5,20(22)-dienolide	-0.300576	0.811928	0.461454
PC (14:1e/4:0)	-0.120252	0.920027	0.461588
PG (18:2/18:2)	0.210648	1.15721	0.462923
5-Hydroxyindole-3-acetic acid	-0.331166	0.794894	0.463365
4-methyl-5-oxo-2-pentyl-2,5-dihydrofuran-3-carboxylic acid	-1.56413	0.338182	0.46468
D-Fructose-1,6-Biphosphate-Trisodium Salt	-0.188632	0.877437	0.466006
D-Galactosamine	-0.552352	0.681907	0.467423
Pyridoxal-5'-phosphate	-0.378311	0.769338	0.468184
Uridine 5'-monophosphate	0.0673501	1.04779	0.46847
5-[(10Z)-14-(3,5-dihydroxyphenyl)tetradec-10-en-1-yl]benzene-1,3-diol	-0.108145	0.92778	0.470915
LPI 17:0	0.274763	1.2098	0.471449
2-{2-oxo-2-[(2-oxo-3-azepanyl)amino]ethoxy}acetic acid	-0.333895	0.793392	0.471927
PG (22:5/22:6)	0.203117	1.15118	0.473939
Spermine	0.969153	1.95769	0.475226
Gamma-Aminobutyric acid	-0.210219	0.864406	0.481714
LPC 18:4	-0.160824	0.894514	0.481728
Aldosterone	0.15812	1.11583	0.48202
Serotonin	-0.165792	0.891439	0.482779
Taurocholic acid	-0.23182	0.85156	0.483373
Glutaconic acid	-0.175873	0.885232	0.485296
2_Furanoic Acid	-0.253201	0.839033	0.485761
LPI 18:1	-0.219554	0.858831	0.486283
Asp-glu	-0.367094	0.775343	0.48667
D-Ribose-1-phosphate	-0.146577	0.903391	0.488105
4-Guanidinobutyric acid	0.442155	1.35863	0.489284
Tyrosylalanine	0.0995937	1.07147	0.489937
3'-Dephosphocoenzyme A	-0.489213	0.712414	0.490433
Trichothec-9-ene-3-α,4-β,8-α,15-tetrol, 12,13-epoxy-	0.297502	1.22901	0.490971
7-Methylxanthine	-0.162777	0.893304	0.493278
N-α-Acetyl-L-lysine	0.550183	1.46427	0.494562
PC (14:0e/5:0)	0.334394	1.26085	0.494932
ethyl 3-cyano-6-methyl-2-(phenylthio)isonicotinate	0.830743	1.7786	0.495487
Andrographolide	-0.298077	0.813336	0.49588
2'-Deoxyinosine	0.255237	1.19353	0.496003
L-Aspartic acid	0.155263	1.11362	0.496162
Cyclic ADP-ribose	-0.596971	0.661141	0.497105
FAHFA (18:0/22:1)	-0.029583	0.979703	0.497322
trans-Cinnamic acid	-0.240023	0.846732	0.498598
6-Ketoprostaglandin F1α	0.208129	1.15519	0.500545
3,5-di(2-furylmethylidene)tetrahydro-2H-pyran-4-one	-0.331389	0.794771	0.500829
LPE 20:5	-0.0971265	0.934893	0.501486
LPG 16:2	0.181513	1.13407	0.50198
2-Pyridylacetic acid	-0.16547	0.891638	0.502085
LPC 20:5	-0.194995	0.873576	0.503236
4',7-Dihydroxyflavanone	2.42154	5.35742	0.504665
β-Pseudouridine	-0.0642791	0.956423	0.504766
4-(4-methylphenyl)-2-phenyl-1,3-thiazole	0.267782	1.20396	0.505163
Threonine	-0.0815183	0.945063	0.505981
LPC 17:1	-0.157504	0.896575	0.506974
4-methoxy-6-(prop-2-en-1-yl)-2H-1,3-benzodioxole	2.08187	4.23354	0.5087
N-α-L-Acetyl-arginine	0.12716	1.09214	0.510668
PS (16:0/20:4)	0.074826	1.05323	0.512709
4-oxododecanedioic acid	0.459503	1.37507	0.513313
5-[(Benzoyloxy)methyl]-4,5,6-trihydroxy-2-cyclohexen-1-yl benzoate	-0.539657	0.687934	0.513701
4-Oxoretinol	-0.12394	0.917678	0.514556
Valine	-0.115573	0.923016	0.516179
LPC 20:4	0.144167	1.10509	0.516751
Hexadecanamide	0.170638	1.12556	0.517109
Prostaglandin B1	0.177147	1.13065	0.518723
PC (20:4/20:4)	-4.41803	0.0467777	0.519257
LPC 18:0	0.223191	1.16731	0.520083
6-(3-hydroxybutan-2-yl)-5-(hydroxymethyl)-4-methoxy-2H-pyran-2-one	0.0749471	1.05332	0.522164
Glycyrrhizic acid	0.361604	1.28485	0.522557
PC (16:0/18:3)	0.223843	1.16784	0.524163
ACar 19:0	0.238067	1.17941	0.525857
LPI 18:2	-0.33853	0.790847	0.527615
Valylproline	0.768053	1.70297	0.528281
PC (22:5e/18:5)	0.260517	1.19791	0.530343
DL-Arginine	-0.188945	0.877247	0.530384
L-Alanyl-L-Lysine	0.255556	1.1938	0.531434
7-Ketodeoxycholic acid	-0.108173	0.927762	0.533463
N-[4-cyano-1-(4-fluorophenyl)-1H-pyrazol-5-yl]cyclohexanecarboxamide	0.188634	1.13968	0.538206
2,3,4,9-Tetrahydro-1H-β-carboline-3-carboxylic acid	0.799009	1.73991	0.538787
ACar 22:2	0.437138	1.35392	0.540115
5α-Dihydrotestosterone	-0.260373	0.834872	0.540622
Carbaprostacyclin	-0.211679	0.863531	0.545153
Adenosine	0.346454	1.27143	0.546399
5-Aminovaleric acid	-0.129912	0.913887	0.547414
Adenylosuccinic acid	-0.450121	0.731981	0.547453
PC (18:3/20:5)	0.157326	1.11522	0.548
Deoxyguanosine	-0.150374	0.901017	0.5502
PC (14:0e/22:0)	0.047338	1.03336	0.550408
PC (20:2/20:2)	0.107754	1.07755	0.550949
octadec-9-ynoic acid	0.133571	1.09701	0.551274
Oleoyl-L-α-lysophosphatidic acid	0.165994	1.12194	0.551715
Cinnamoylglycine	-0.554655	0.68082	0.551855
Ribitol	-0.193163	0.874686	0.55219
D-Panthenol	0.0741461	1.05274	0.552411
LPC 15:0	-0.131583	0.912829	0.55251
PC (16:0/20:4)	-0.254115	0.838501	0.552649
1,4-dihydroxy-1,4-dimethyl-7-(propan-2-ylidene)-decahydroazulen-6-one	-0.294071	0.815597	0.552652
5-Hydroxy-L-Tryptophan	-0.287698	0.819208	0.553906
10E,12Z-Octadecadienoic acid	-0.150304	0.90106	0.554328
Biotin	-0.249568	0.841148	0.55436
Linoleic acid	0.0461044	1.03247	0.554377
Nicotinamide adenine dinucleotide	-0.463413	0.725269	0.556044
2,3-Bisphospho-D-glyceric acid	0.406699	1.32565	0.556524
β-D-Glucopyranuronic acid	-0.153099	0.899317	0.559558
N-Acetylthreonine	0.172836	1.12727	0.560401
9,10-Dihome	-0.109179	0.927116	0.564721
Bilirubin	-0.384666	0.765956	0.564973
PC (14:1e/2:0)	-0.0850071	0.94278	0.5667
Mesterolone	0.133349	1.09684	0.567193
Palmitoyl ethanolamide	0.0955546	1.06848	0.568059
2-Mercaptoethanol	0.102993	1.074	0.568767
L-Tyrosinemethylester	-0.220022	0.858552	0.569833
Pantothenic acid	-0.354659	0.782055	0.570265
LPS 22:4	-0.149453	0.901592	0.572303
ACar 22:7	-0.294145	0.815555	0.572408
PC (18:2e/2:0)	0.110564	1.07965	0.572911
PB-22 N-(4-Hydroxypentyl)-3-carboxyindole metabolite	1.12963	2.18803	0.573282
3-Hydroxy-3-methylbutanoic acid	-0.156344	0.897296	0.573921
Palmitoylcarnitine	0.225348	1.16906	0.574149
OxPC (16:0-18:2+2O)	0.239437	1.18053	0.575305
Fludrocortisone acetate	0.455648	1.3714	0.580555
(-)-Caryophyllene oxide	-0.432518	0.740967	0.580635
1-(2-methoxy-4-nitrophenyl)pyrrolidine	0.445869	1.36213	0.581213
LPE 17:0	0.16735	1.12299	0.582298
(-)-Epigallocatechin	-0.178344	0.883717	0.582499
Dehydrocholic acid	-0.0594704	0.959616	0.582537
5-Methyltetrahydrofolic acid	-0.508857	0.702779	0.583367
N3-cyclohexyl-3-azabicyclo[3.2.2]nonane-3-carbothioamide	0.105429	1.07581	0.583597
LPC 17:0	0.109384	1.07877	0.585411
L-Hydroxyproline	-0.215404	0.861305	0.586542
Shikimic acid	0.139736	1.1017	0.586692
2-Isopropylmalate	-0.423123	0.745808	0.589434
LPC 19:0	0.194254	1.14413	0.589598
Benzoylecgonine	-0.434442	0.73998	0.589638
Methyl indole-3-acetate	0.278217	1.21269	0.589644
4-Nitrophenol	-0.0508975	0.965336	0.59114
N-Cyclohexyl-N-methylcyclohexanamine	2.63073	6.1934	0.591232
3-(3,4,5-trimethoxyphenyl)propanoic acid	0.122485	1.08861	0.592057
4-(cyclohexylcarbonyl)-1-phenethylpiperazine-2,6-dione	0.100494	1.07214	0.59285
LPG 16:0	0.105418	1.07581	0.592962
2-Deoxy-D-galactose	-0.0773766	0.94778	0.592995
Isopropyl myristate	0.132688	1.09633	0.593455
Picolinic acid N-oxide	-0.23854	0.847603	0.593664
6-Methylquinoline	-0.120325	0.91998	0.595304
Heptanoic acid	-0.128684	0.914665	0.595311
4-(4-nitrophenylazo)aniline	-0.677901	0.625074	0.596111
Lysops 22:5	0.320854	1.24907	0.597993
PG (18:2/22:5)	-0.426707	0.743958	0.598732
3,4-MDEA-d5	-0.268418	0.830229	0.598887
1-(4-Methoxyphenyl)-2-propanone	-0.105294	0.929616	0.601445
L-Ascorbate	-0.174646	0.885985	0.605313
4-acetyl-4-(ethoxycarbonyl)heptanedioic acid	-0.182916	0.88092	0.605973
5,8-dihydroxy-10-methyl-5,8,9,10-tetrahydro-2H-oxecin-2-one	0.189956	1.14073	0.607907
Esculin	-0.848489	0.555366	0.608266
16-Heptadecyne-1,2,4-triol	0.059089	1.04181	0.608985
3-Aminoisobutyric acid	-0.0880073	0.940821	0.611979
S-(Methyl)Glutathione	-0.0680378	0.953935	0.613264
D-Ribose5-phophate	0.174123	1.12828	0.613795
ACar 22:6	0.0747087	1.05315	0.614992
FAHFA (18:2/20:4)	-0.0900997	0.939458	0.61643
Azelaic acid	0.0643394	1.04561	0.616744
beta hydroxybutyrate	0.0932376	1.06676	0.617299
Nicotinamide adenine dinucleotide (NAD+)	-0.457783	0.728104	0.617467
(3beta,9xi)-3-(beta-D-Glucopyranosyloxy)-14-hydroxycard-20(22)-enolide	0.144834	1.1056	0.617761
N1-[4-(aminosulfonyl)phenyl]-2,2-dimethylpropanamide	-0.0387323	0.97351	0.618073
ACar 16:3	0.317095	1.24582	0.618532
Thromoboxane B1	-0.153977	0.898769	0.618823
L-Glutathione (reduced)	-0.177239	0.884394	0.620409
PE (16:0/18:2)	-0.0390334	0.973307	0.623843
Guanosine 5'-diphospho-D-mannose	-0.0688952	0.953368	0.624056
N-Acetyl-DL-glutamic acid	-0.280212	0.82347	0.625642
PG (18:1/18:2)	-0.460675	0.726646	0.627087
Cortisone	0.318518	1.24705	0.629378
PC (5:0/13:1)	-0.162787	0.893298	0.630845
DL-3-Aminoisobutyric acid	-0.119882	0.920263	0.631378
Allantoin	0.173122	1.1275	0.631607
N6-Acetyl-L-lysine	-0.112306	0.925108	0.631774
α-Lactose	-0.106942	0.928554	0.634595
Uracil	0.226804	1.17024	0.636327
Isobutyryl carnitine	-0.106227	0.929015	0.63671
Carnosine	-0.0802081	0.945921	0.637864
Estradiol	-0.107965	0.927896	0.638307
3-(allylsulfanyl)-4-[4-(benzyloxy)phenyl]-5-methyl-4H-1,2,4-triazole	0.139037	1.10117	0.640189
ACar 12:3	-0.0932038	0.937439	0.6403
Pyridoxamine	0.0558791	1.03949	0.644865
Dl-Glutamic acid	0.183659	1.13576	0.645371
Methyl palmitate	0.128351	1.09304	0.646711
2-Oxindole	-0.185661	0.879246	0.649985
Crotonic acid	0.0697325	1.04952	0.651111
DL-Tryptophan	-0.10257	0.931373	0.651144
7-(4-methylpiperazino)pyrimido[4,5-d]pyrimidine-2,4(1H,3H)-dithione	-0.0950883	0.936215	0.653618
N-Caffeoyl Putrescine	0.0490514	1.03458	0.655064
JWH 018 N-(5-hydroxypentyl) β-D-Glucuronide	-0.150182	0.901137	0.655427
Pyruvic acid	0.0719768	1.05116	0.655457
4-Acetamidobutanoic acid	-0.0763769	0.948437	0.655904
LPC 22:6	-0.0434276	0.970347	0.656548
2-Aminooctanoic acid	0.266161	1.2026	0.656828
PE (18:2/20:4)	0.511642	1.42567	0.658655
N-Acetyl-D-galactosamine	-0.213042	0.862716	0.659643
ACar 20:0	0.594528	1.50998	0.661032
3-hydroxy-2-[5-nitro-2-(1-pyrrolidinyl)benzyl]propanenitrile	0.277932	1.21246	0.662047
trans-3-Hexenoic acid	-0.122254	0.918751	0.663407
1-[2,6-di(tert-butylamino)-4-methyl-3-pyridyl]ethan-1-one	0.131027	1.09507	0.66594
FAHFA (16:0/22:5)	0.274759	1.20979	0.667361
4-(β-D-Glucopyranosyloxy)benzyl 4,5-dideoxy-3-C-methylpentonate	0.874536	1.83342	0.66823
LPC 20:3	0.0822049	1.05863	0.669688
Troxerutin	0.0905065	1.06474	0.670458
2-Arachidonoyl glycerol	0.0487025	1.03433	0.671649
L-Cystathionine	-0.101233	0.932236	0.673274
L-Alanyl-L-leucine	-0.0651665	0.955835	0.675683
Υ-Glutamylcysteine	-0.205916	0.866988	0.67677
L-Serine	-0.126658	0.915951	0.678316
2-methyl-2,3,4,5-tetrahydro-1,5-benzoxazepin-4-one	-0.097511	0.934644	0.679481
L-Phenylalanine	-0.112448	0.925017	0.681646
8Z,11Z,14Z-Eicosatrienoic acid	0.139034	1.10117	0.682715
Argininosuccinic acid	-0.0825452	0.94439	0.686617
Eicosapentaenoic acid	-0.128133	0.915015	0.687415
3-Hydroxybutyric acid	0.0631694	1.04476	0.690282
2-Furoic acid	-0.257004	0.836824	0.690529
PC (18:2e/20:5)	0.313595	1.2428	0.691036
Carbamoylphosphate	0.0479252	1.03378	0.691169
PC (20:3/20:4)	-0.0488777	0.966688	0.691497
AL 8810 Methyl ester	0.608734	1.52492	0.692515
Adenine	-0.181387	0.881855	0.698684
2-[(3-methylbenzo[b]thiophen-2-yl)carbonyl]benzoic acid	-0.0478559	0.967373	0.700159
2-[4-(tert-butyl)phenyl]-5-(2-nitrophenyl)-1,3,4-oxadiazole	0.123802	1.0896	0.70017
Succinic semialdehyde	-0.0666441	0.954857	0.701295
1-Methylguanosine	-0.26921	0.829774	0.701944
21-Deoxycortisol	-0.198172	0.871655	0.702231
3-(4-hydroxy-3-methoxyphenyl)propanoic acid	-0.227601	0.854054	0.702596
N-Acetylalanine	0.118173	1.08536	0.702603
D-(+)-Mannose	-0.0778788	0.94745	0.703069
PC (18:3/18:3)	-0.122904	0.918337	0.703412
LPC 19:1	0.210626	1.15719	0.704489
PE (16:1/20:4)	0.0113076	1.00787	0.70513
Adenosine 3'5'-cyclic monophosphate	-0.0718365	0.951426	0.706285
3-Methyladipic acid	-0.240286	0.846577	0.707879
N-Acetylornithine	0.297762	1.22924	0.708308
Gly-Tyr-Ala	-0.119638	0.920419	0.709781
LPS 20:3	0.072585	1.0516	0.710097
DL-4-Hydroxyphenyllactic acid	0.0203392	1.0142	0.712191
LPC 22:5	0.130738	1.09485	0.714032
ADP-ribose	0.0259577	1.01816	0.715142
FAHFA (18:1/20:3)	-0.0451716	0.969175	0.71556
1,4-dihydroxyheptadec-16-en-2-yl acetate	0.0858284	1.0613	0.717025
16-Hydroxyhexadecanoic acid	-0.092961	0.937596	0.71708
FAHFA (20:5/18:2)	-0.131917	0.912618	0.717376
N-[4-(diethylamino)phenyl]-N'-phenylurea	-0.728989	0.603327	0.719973
LPI 20:3	0.107211	1.07714	0.720385
Undecanoic acid	-0.0583188	0.960383	0.721015
lipoamide	-0.20448	0.867851	0.723915
9-Oxo-10(E),12(E)-octadecadienoic acid	0.125851	1.09115	0.725973
Inosine	-0.133371	0.911699	0.728518
5α-Pregnan-3,20-dione	-0.0628331	0.957382	0.729174
N6,N6,N6-Trimethyl-L-lysine	0.0405546	1.02851	0.729377
2,3-dihydroxypropyl 12-methyltridecanoate	-0.0814536	0.945105	0.732304
FAHFA (16:0/18:0)	-0.0767429	0.948196	0.732671
PC (4:0/16:3)	0.137996	1.10038	0.734776
4-Pyridoxic acid	-0.110648	0.926172	0.736827
methyl 3,4,5-trihydroxycyclohex-1-ene-1-carboxylate	0.135668	1.0986	0.736836
PC (18:4/20:5)	0.0416568	1.0293	0.738235
5-Methyluridine	0.195724	1.1453	0.739283
AL 8810	-0.0493579	0.966366	0.740445
7-methyl-3-nitroimidazo[1,2-a]pyridine	0.0371169	1.02606	0.740565
Milbemycin A4 oxime	-0.100113	0.93296	0.741582
Formononetin	0.0600924	1.04253	0.742903
15-Deoxy-δ12,14 -Prostaglandin J2	-6.90703e-05	0.999952	0.743507
LPA 22:6	-0.0676126	0.954216	0.744178
Suberic acid	-0.27862	0.824379	0.744336
Quercetin-3β-D-glucoside	-0.370858	0.773322	0.745258
Melibiose	0.108766	1.07831	0.745433
Indole-3-lactic acid	-0.0899627	0.939547	0.746315
16-(Hexopyranosyloxy)-7-hydroxy-8,9-epoxypimaran-18-oic acid	-0.128661	0.91468	0.746495
Feruloylcholine	-0.173263	0.886834	0.746805
Acetyl-CoA	0.0132601	1.00923	0.748663
DL-Carnitine	0.0523587	1.03696	0.750433
3-(3,5-dimethyl-1H-pyrrol-2-yl)-2-(2-thienylcarbonyl)acrylonitrile	0.49792	1.41218	0.754104
D-(-)-Glutamine	0.0503259	1.0355	0.758227
PC (2:0/16:2)	-0.118565	0.921103	0.7583
Lysine	0.0409578	1.0288	0.758943
L-Glutamic acid	-0.0549735	0.962612	0.760023
2-(2-amino-3-methylbutanamido)-3-phenylpropanoic acid	-0.172347	0.887398	0.7604
D-Sedoheptulose 7-phosphate	0.0554411	1.03918	0.760471
LPS 18:1	0.0288676	1.02021	0.761809
ADBICA N-pentanoic acid metabolite	0.229835	1.1727	0.765047
D-(+)-Maltose	0.154771	1.11324	0.772843
N'-Formylkynurenine	-0.198362	0.871539	0.773278
L-Alanyl-L-proline	0.0592287	1.04191	0.775549
C-8 Ceramide-1-phosphate	0.173173	1.12754	0.779803
Decanoylcarnitine	0.0125482	1.00874	0.782325
3-Indoxyl sulphate	0.0442106	1.03112	0.783771
Lysopc 16:0 (2N Isomer)	-0.125407	0.916745	0.784036
1,5-Anhydro-D-glucitol	-0.0557336	0.962105	0.7864
ACar 23:5	0.0963512	1.06907	0.787023
LSD-d3	0.105624	1.07596	0.7897
Uridine 5'-diphosphogalactose	-0.130259	0.913668	0.790107
Acetophenone	-0.0224343	0.98457	0.791331
2'-O-Methyladenosine	-0.194388	0.873943	0.791468
Riboflavin	-0.0840077	0.943433	0.792097
N-Benzylformamide	0.00594879	1.00413	0.796578
Hippuric acid	-0.511706	0.701392	0.800565
LPA 16:1	-0.0425585	0.970932	0.80196
L-(-)-Methionine	0.266694	1.20305	0.802301
Cis-11,14,17-Eicosatrienoic Acid (C20:3)	0.132601	1.09627	0.805189
β-Cortolone	0.168406	1.12382	0.806735
Pyridoxine	-0.0655579	0.955576	0.808084
ACar 7:0	-0.156926	0.896934	0.808281
7-(2-thienyl)[1,2,4]triazolo[4,3-a]pyrimidine	-0.0387299	0.973512	0.809533
3-[1-(dimethylamino)-1H-pyrrol-2-yl]-2-(2-furylcarbonyl)acrylonitrile	0.0644567	1.04569	0.811339
Cafestol	0.327402	1.25475	0.813486
dUMP	0.142405	1.10374	0.817615
JWH 412 N-(5-hydroxypentyl) metabolite	0.115666	1.08348	0.817944
Glycylproline	0.0305538	1.0214	0.817968
LPS 16:0	0.0156835	1.01093	0.821061
(5E)-7-methylidene-10-oxo-4-(propan-2-yl)undec-5-enoic acid	-0.0197979	0.986371	0.821357
β-Alanine	0.0289479	1.02027	0.822782
Tetradecanedioic acid	-0.124009	0.917634	0.825945
Testosterone	0.0708901	1.05036	0.826754
Decanoic acid	-0.0137457	0.990517	0.827768
N-Acetyl-aspartic acid	-0.0769545	0.948057	0.82868
PC (18:0/22:6)	-0.0297515	0.979589	0.829209
11β-Hydroxyandrosterone	-0.0667243	0.954803	0.830706
Methyl dihydrojasmonate	-0.0909202	0.938924	0.833819
Perillic acid	-0.0222068	0.984725	0.834303
N6,2-O-Dibutyryladenosine-3,5-cyclic monophosphate	-0.0232862	0.983989	0.834329
5-Methoxyindole-3-Carbaldehyde	0.056598	1.04001	0.83473
3-Methylglutaric acid	-0.0126056	0.991301	0.835719
(2E)-1-(2-hydroxy-3,4,5,6-tetramethoxyphenyl)-3-phenylprop-2-en-1-one	-0.319796	0.801183	0.836968
(12Z)-9,10,11-trihydroxyoctadec-12-enoic acid	-0.134935	0.910711	0.837207
LPA 22:4	0.0321973	1.02257	0.841038
PC (18:2/20:5)	-0.000745277	0.999484	0.842422
17(S)-HETE	-0.0582144	0.960452	0.842576
FAHFA (18:2/14:1)	0.0574805	1.04065	0.842844
All-Trans-13,14-Dihydroretinol	0.0960375	1.06883	0.843635
Aflatoxin M1	-0.0325024	0.977723	0.844275
2,4-Dimethylbenzaldehyde	-0.0126659	0.991259	0.844449
PC (18:4e/4:0)	-0.036131	0.975267	0.846382
Phenylacetylglycine	0.0710768	1.0505	0.849668
D-Erythrose 4-phosphate	0.806352	1.74878	0.849851
12-Hete	-0.0398639	0.972747	0.851369
PG (18:1/20:4)	0.0425263	1.02992	0.853424
Hydroquinone	0.0171979	1.01199	0.855041
2,4-Dinitrophenol	-0.794127	0.576692	0.857363
LPG 18:3	0.0190887	1.01332	0.859594
Corchorifatty acid F	-0.0609736	0.958617	0.860932
Nebularine	-0.0593897	0.95967	0.861236
7-Aminoflunitrazepam-d7	0.0390943	1.02747	0.862296
4-(2,3-dihydro-1,4-benzodioxin-6-yl)butanoic acid	0.000379026	1.00026	0.864149
PG (18:1/22:6)	0.229259	1.17223	0.86428
Leucylproline	0.0286769	1.02008	0.864695
LPE 22:6	0.0343235	1.02408	0.865691
ACar 18:2	0.11268	1.08123	0.868436
DL-α-Aminocaprylic acid	-0.0316219	0.97832	0.868572
LPS 20:4	0.0147494	1.01028	0.869502
Propionyl-L-carnitine	-0.0993384	0.933461	0.871203
2-Hydroxycaproic acid	-0.0890314	0.940154	0.87393
Thiamine	0.0127749	1.00889	0.874635
6-methyl-4-(morpholinomethyl)-2H-chromen-2-one	-0.0487952	0.966743	0.875085
Phosphocholine	-0.0182757	0.987412	0.876604
Glycyl-L-leucine	0.0225694	1.01577	0.876633
N-Acetylmannosamine	0.0436518	1.03072	0.876866
Noroxycodone-d3	0.228214	1.17138	0.877037
(11E,15Z)-9,10,13-trihydroxyoctadeca-11,15-dienoic acid	-0.0416062	0.971573	0.877166
N-Acetylglucosamine	-0.0292778	0.979911	0.877648
α-Linolenic acid	-0.0327903	0.977528	0.884419
DL-Malic acid	-0.0503127	0.965727	0.88466
OxPC (16:0-20:3+1O(1Cyc))	0.185146	1.13693	0.88771
PC (14:1e/3:0)	-0.0321583	0.977956	0.887754
Uridine5-diphosphate	-0.0917931	0.938356	0.887817
20-Dihydro 6α-methylprednisone	0.146409	1.10681	0.890242
cis-2-Decenoic acid	-0.0213932	0.985281	0.890444
OxPC (16:0-18:1+3O)	0.214494	1.1603	0.891729
6 β-Hydroxycortisol	0.0860462	1.06146	0.892188
LPE 20:4	0.0178504	1.01245	0.894051
3-methyl-5-oxo-5-(4-toluidino)pentanoic acid	-0.130165	0.913727	0.894788
Azaspiracid-1	0.00619126	1.0043	0.897531
PC (18:2/18:2)	0.165308	1.12141	0.898134
11-Deoxy prostaglandin F1α	0.031491	1.02207	0.899518
3-Hydroxy-3-methylglutaric acid	0.0892568	1.06382	0.899862
Dihydroxyacetone phosphate	-0.0472547	0.967776	0.900231
α-D-Glucose-1,6-bisphosphate	-0.352389	0.783286	0.901226
2-Aminoadipic acid	-0.169555	0.889117	0.901472
Allocholic acid	-0.176931	0.884583	0.901632
Butyryl-coenzyme A	-0.0245398	0.983134	0.9017
Glucose 1-phosphate	-0.0465816	0.968228	0.905058
LPC 22:4	-0.0761815	0.948565	0.907115
Progesterone	-0.04013	0.972567	0.908166
Gly-Phe	-0.00400976	0.997225	0.912291
N-Methylglutamic acid	-0.267398	0.830816	0.91332
Androstenedione	0.0301539	1.02112	0.913541
Fumaric acid	-0.0358097	0.975484	0.913749
D-α-Hydroxyglutaric acid	0.053226	1.03758	0.915014
P-Aminobenzoate	-0.0184985	0.98726	0.916189
Ethylmalonic acid	-0.00241447	0.998328	0.918269
Styrene	4.37156e-05	1.00003	0.918698
LPC 18:1	-0.0115554	0.992022	0.92075
Dihydrouracil	0.177049	1.13057	0.921502
2-Hydroxy-2-methylbutanedioic acid	-0.491129	0.711468	0.921838
AICA ribonucleotide	0.731719	1.66062	0.924247
Vitamin A	0.0113292	1.00788	0.924404
Guanidinoethyl sulfonate	-0.0179936	0.987605	0.924459
Calcitriol	-0.0971176	0.934899	0.925031
5-(tert-butyl)-2-methyl-N-(5-methyl-3-isoxazolyl)-3-furamide	0.196503	1.14592	0.926822
10-Hydroxydecanoic acid	-0.024286	0.983307	0.927051
3-Methylhistidine	0.000842623	1.00058	0.92841
Pipecolic acid	0.00441336	1.00306	0.931905
D-erythrose-4-phosphate	0.0229079	1.01601	0.932147
LPA 20:4	-0.00534675	0.996301	0.93433
2-Aminoethanesulfinic Acid	-0.112401	0.925047	0.935349
AB-PINACA N-(2-fluoropentyl) isomer	0.116156	1.08384	0.937201
cis-7-Hexadecenoic Acid	0.0300073	1.02102	0.937633
Deoxycorticosterone	-0.29439	0.815417	0.938706
DL-Lysine	0.00357201	1.00248	0.939532
LPI 16:0	-0.0245693	0.983114	0.940619
α-Aspartylphenylalanine	-0.180168	0.8826	0.942303
Pro-Leu	-0.249125	0.841406	0.942424
LPE 16:1	-0.0363414	0.975125	0.942581
cis-4-Hydroxy-D-proline	0.0535875	1.03784	0.943015
LPC 16:2	0.0267841	1.01874	0.94419
16(R)-HETE	0.00828219	1.00576	0.946459
2-(acetylamino)-3-(1H-indol-3-yl)propanoic acid	-0.11481	0.923504	0.95262
N-Glycolylneuraminic acid	0.0700795	1.04977	0.95376
Acetylcholine	-0.00146101	0.998988	0.954454
Cytidine-5'-monophosphate	0.0502468	1.03544	0.954996
N-[(4-hydroxy-3-methoxyphenyl)methyl]-8-methylnonanamide	0.0731538	1.05201	0.955286
3,8,9-trihydroxy-10-propyl-3,4,5,8,9,10-hexahydro-2H-oxecin-2-one	-0.0284629	0.980464	0.957499
ACar 8:0	0.216485	1.1619	0.957623
Glycerol	-0.0729837	0.95067	0.958009
PE (17:0/17:1)	-0.00270212	0.998129	0.958232
3-Indoleacrylic acid	0.0446329	1.03142	0.958354
Ip7G	0.0521048	1.03678	0.960462
(5-L-Glutamyl)-L-Amino Acid	0.0208403	1.01455	0.960784
Picolinic acid	-0.0117238	0.991907	0.967191
N-(1-benzyl-4-piperidinyl)-4-(1H-pyrazol-1-yl)benzamide	0.151469	1.1107	0.969444
Oxoadipic Acid	-0.00111632	0.999227	0.969974
Indole-3-acrylic acid	-0.00408181	0.997175	0.97142
N-Acetylaspartic acid	-0.0297441	0.979594	0.973357
Stercobilin	-0.08901	0.940168	0.976654
L-(+)-Tartaric acid	-0.152163	0.899901	0.976768
2'-Deoxyguanosine 5'-triphosphate (dGTP)	-0.0580887	0.960536	0.978234
Prostaglandin E2	-0.0549294	0.962642	0.97941
N-Acetyl-DL-tryptophan	-0.0656566	0.95551	0.979708
8(S)-Hydroxy-(5Z,9E,11Z,14Z)-eicosatetraenoic acid	0.00948637	1.0066	0.980047
L-Ergothioneine	-0.0137481	0.990516	0.980595
Palmitoleic acid	-0.0335312	0.977026	0.982185
4-Methylphenol	-0.0178065	0.987733	0.98505
α-Eleostearic acid	-0.0141561	0.990236	0.987194
PC (9:0/9:0)	0.05892	1.04169	0.990989
LPS 22:5	-0.0572122	0.96112	0.991445
PC (20:3/22:6)	0.18261	1.13494	0.992123
Desmethylclozapine	0.108718	1.07827	0.99232
1,4-diaminobutane	-3.71888e-05	0.999974	0.993196
tert-Butyl N-[1-(aminocarbonyl)-3-methylbutyl]carbamate	0.0808944	1.05767	0.993886
A-Ketoglutaric Acid	-0.136398	0.909788	0.994001
2,6-Di-tert-butyl-1,4-benzoquinone	-0.128984	0.914475	0.994049
Acrylic acid	-0.00942027	0.993492	0.994073
(R)-Lipoic Acid	-0.000396954	0.999725	0.994712
Corticosterone	-0.0784267	0.94709	0.99493
Etiocholanolone	0.0299427	1.02097	0.996704
Hexanoylcarnitine	0.143931	1.10491	0.999787
