# Supplementary material for: Loss of miR-23b/27b/24-1 Cluster Impairs Glucose Tolerance via Glycolysis Pathway in Mice
Source: Int J Mol Sci. 2021 Jan 7;22(2):550. doi: 10.3390/ijms22020550 (PMC7826568; doi:10.3390/ijms22020550)
Supplement: Supplementary file 1 [file ijms-22-00550-s001.zip › table S3.xlsx]

## Sheet: Sheet1
Gene ID	Gene Symbol	Type	Ensembl Gene ID	log2 (M_HFD_KO/M_HFD_WT)	Qvalue (M_HFD_WT-vs-M_HFD_KO)	Pvalue(M_HFD_WT-vs-M_HFD_KO)
100043914	Zfp968	mRNA	ENSMUSG00000078898	4.6094	0.00161419	0.000383462
100041504	LOC100041504	mRNA	ENSMUSG00000094121	4.59276	0.00174604	0.000418386
70638	Fam189a1	mRNA	ENSMUSG00000030518	4.16934	0.00967351	0.00291725
101488212	Evi2	mRNA	ENSMUSG00000070354	4.11044	0.011873	0.00367851
545192	Baiap3	mRNA	ENSMUSG00000047507	3.99941	0.000424617	8.83818e-05
71932	Ephx3	mRNA	ENSMUSG00000037577	3.80677	0.0300479	0.0107101
100042960	Gm4131	mRNA	ENSMUSG00000100486	3.80677	0.0300479	0.0107101
74626	Tmem81	mRNA	ENSMUSG00000048174	3.76918	0.0332269	0.0120588
102902673	Gm21992	mRNA	ENSMUSG00000096370	3.73059	0.0367872	0.013581
110084	Dnah1	mRNA	ENSMUSG00000019027	3.69985	0.00231676	0.000574566
319153	Hist1h3i	mRNA	ENSMUSG00000101972	3.67297	0.0424756	0.0161333
69123	Eci3	mRNA	ENSMUSG00000021416	3.58437	0.00404365	0.0010763
17071	Ly6f	mRNA	ENSMUSG00000022583	3.45884	0.00702788	0.00201932
239606	Slc2a13	mRNA	ENSMUSG00000036298	3.32134	0.0121855	0.00379359
12555	Cdh15	mRNA	ENSMUSG00000031962	3.32134	0.0121855	0.00379359
668101	Sirpb1b	mRNA	ENSMUSG00000095028	3.16934	0.0211365	0.00713366
100061	Lrrc19	mRNA	ENSMUSG00000049799	3.16934	0.0211365	0.00713366
224813	Lrrc73	mRNA	ENSMUSG00000071073	3.16934	0.0211365	0.00713366
71840	Tekt4	mRNA	ENSMUSG00000024175	3.16934	0.0211365	0.00713366
170738	Kcnh7	mRNA	ENSMUSG00000059742	3.16934	0.0211365	0.00713366
57430	Sult3a1	mRNA	ENSMUSG00000069668	3.12279	3.77408e-11	3.46066e-12
13048	Cux2	mRNA	ENSMUSG00000042589	3.07576	1.7636e-33	6.98257e-35
77647	Trat1	mRNA	ENSMUSG00000030775	2.99941	0.0363961	0.0134209
20192	Ryr3	mRNA	ENSMUSG00000057378	2.99941	0.0363961	0.0134209
229323	Gpr171	mRNA	ENSMUSG00000050075	2.9063	0.00329674	0.000856873
21916	Tmod1	mRNA	ENSMUSG00000028328	2.76424	1.00842e-05	1.56551e-06
337924	Cyp3a44	mRNA	ENSMUSG00000054417	2.69985	0.00938548	0.00280727
76920	Arrdc5	mRNA	ENSMUSG00000073380	2.69985	0.00938548	0.00280727
333424	A4gnt	mRNA	ENSMUSG00000037953	2.69985	0.00938548	0.00280727
18426	Ovol1	mRNA	ENSMUSG00000024922	2.61051	0.03371	0.0122655
21819	Tg	mRNA	ENSMUSG00000053469	2.58437	0.0156322	0.0050533
14963	H2-Bl	mRNA	ENSMUSG00000073406	2.54785	7.81402e-05	1.40754e-05
18511	Pax9	mRNA	ENSMUSG00000001497	2.45884	0.0260286	0.00905321
13088	Cyp2b10	mRNA	ENSMUSG00000030483	2.42408	1.59968e-298	1.04317e-300
13214	Defb1	mRNA	ENSMUSG00000044748	2.32774	4.91023e-29	2.16628e-30
228677	Sptlc3	mRNA	ENSMUSG00000039092	2.32134	3.95497e-05	6.75303e-06
215493	A3galt2	mRNA	ENSMUSG00000028794	2.32134	0.0424703	0.0161256
70894	Efcab3	mRNA	ENSMUSG00000020690	2.32134	0.0424703	0.0161256
259277	Klk8	mRNA	ENSMUSG00000064023	2.32134	0.0424703	0.0161256
434797	Gm5640	mRNA	ENSMUSG00000079534	2.2969	0.000808658	0.000178004
13086	Cyp2a4	mRNA	ENSMUSG00000074254	2.24123	8.20592e-91	1.41971e-92
66931	1700010I14Rik	mRNA	ENSMUSG00000023873	2.2218	0.0169953	0.00556746
12095	Bglap3	mRNA	ENSMUSG00000074489	2.13691	0.00272967	0.000694042
17873	Gadd45b	mRNA	ENSMUSG00000015312	2.09678	2.73559e-158	3.05816e-160
118454	Gjc2	mRNA	ENSMUSG00000043448	2.08687	0.000170606	3.26953e-05
100039484	Gm2260	pseudo		2.01553	0.000357577	7.33927e-05
100039503	Gm2274	pseudo		2.01553	0.000357577	7.33927e-05
116904	Alpk3	mRNA	ENSMUSG00000038763	1.99941	0.017012	0.0055752
244757	Glb1l2	mRNA	ENSMUSG00000036395	1.99941	0.0429642	0.016376
20860	Sult1e1	mRNA	ENSMUSG00000029272	1.96946	9.08739e-30	3.96681e-31
117586	A1bg	mRNA	ENSMUSG00000022347	1.93432	3.56343e-07	4.60011e-08
14262	Fmo3	mRNA	ENSMUSG00000026691	1.92279	1.59185e-11	1.41517e-12
78473	Skap1	mRNA	ENSMUSG00000057058	1.9063	0.0266389	0.00931155
64381	Ms4a8a	mRNA	ENSMUSG00000024730	1.87388	3.68876e-11	3.37506e-12
70701	Nipal1	mRNA	ENSMUSG00000067219	1.86521	5.90251e-95	9.89774e-97
108168162	Gm43305	mRNA		1.85088	0	0
22411	Wnt11	mRNA	ENSMUSG00000015957	1.84741	0.0162498	0.00528863
279029	Stkld1	mRNA	ENSMUSG00000049897	1.80677	0.0409292	0.0154152
100039830	Gm2446	mRNA		1.78565	1.8622e-05	2.99132e-06
105245449	Gm40902	mRNA		1.75616	0.000121582	2.26692e-05
434130	Ccdc8	mRNA	ENSMUSG00000041117	1.71562	0.00920795	0.00274192
108167321	LOC108167321	mRNA		1.70965	0.0144804	0.00460774
102633156	LOC102633156	mRNA	ENSMUSG00000078899	1.68072	0.0118223	0.0036581
18752	Prkcg	mRNA	ENSMUSG00000078816	1.66238	0.0227401	0.00775959
19416	Rasd1	mRNA	ENSMUSG00000049892	1.64966	1.04412e-09	1.0658e-10
102638555	Gm38510	mRNA		1.64951	0.0169642	0.00555614
620078	C130026I21Rik	mRNA	ENSMUSG00000052477	1.63323	0.0265066	0.00925472
13119	Cyp4a14	mRNA	ENSMUSG00000028715	1.61595	0	0
14939	Gzmb	mRNA	ENSMUSG00000015437	1.60032	1.16104e-07	1.43083e-08
18406	Orm2	mRNA	ENSMUSG00000061540	1.59347	0	0
212892	Rsph4a	mRNA	ENSMUSG00000039552	1.58437	0.00167568	0.000399685
624866	Lekr1	mRNA	ENSMUSG00000074579	1.58437	0.0204154	0.00685222
102631705	Gm29975	mRNA		1.58437	0.00167568	0.000399685
105244999	Gm40514	mRNA		1.55093	2.87085e-170	2.92281e-172
105244392	Gm40011	mRNA		1.54303	3.91332e-13	3.18212e-14
214523	Tmprss4	mRNA	ENSMUSG00000032091	1.53546	0.00665912	0.00189874
66438	Hamp2	mRNA	ENSMUSG00000056978	1.53412	0	0
20962	Sycp3	mRNA	ENSMUSG00000020059	1.51398	0.0300213	0.0106956
280287	Kiss1	mRNA	ENSMUSG00000116158	1.50191	0.00358145	0.000938259
22114	Tssk1	mRNA	ENSMUSG00000041566	1.47334	0.0159155	0.00516131
217698	Acot5	mRNA	ENSMUSG00000042540	1.47334	0.0159155	0.00516131
67445	C1qtnf4	mRNA	ENSMUSG00000040794	1.45884	0.0264151	0.00920523
627214	Fam196a	mRNA	ENSMUSG00000073805	1.45884	0.00517072	0.00142446
15402	Hoxa5	mRNA	ENSMUSG00000038253	1.44687	0.00851071	0.00250683
17907	Mylpf	mRNA	ENSMUSG00000030672	1.44687	0.00851071	0.00250683
21786	Tff3	mRNA	ENSMUSG00000024029	1.43804	5.86476e-49	1.73664e-50
53419	Corin	mRNA	ENSMUSG00000005220	1.43237	0.0139884	0.00442978
11551	Adra2a	mRNA	ENSMUSG00000033717	1.40151	0.00395521	0.00104881
73660	Cabp4	mRNA	ENSMUSG00000024842	1.39173	0.0379031	0.0140573
17394	Mmp8	mRNA	ENSMUSG00000005800	1.39173	0.0379031	0.0140573
105246872	Gm42078	mRNA		1.35399	3.33747e-05	5.61871e-06
67983	Pdzd9	mRNA	ENSMUSG00000030887	1.34021	0.0482877	0.0187136
319476	Lrtm1	mRNA	ENSMUSG00000045776	1.33671	1.05643e-33	4.15458e-35
53973	Cyp3a41a	mRNA	ENSMUSG00000075551	1.32134	0.0284016	0.0100184
73363	1700056E22Rik	mRNA	ENSMUSG00000044854	1.32134	0.00792838	0.0023113
12525	Cd8a	mRNA	ENSMUSG00000053977	1.32134	0.00117796	0.000270661
668039	Gm14434	mRNA	ENSMUSG00000078881	1.31683	3.66131e-15	2.67265e-16
108168925	Gm46841	lncRNA		1.30197	0.00682319	0.00195279
242702	Myom3	mRNA	ENSMUSG00000037139	1.29352	9.74276e-28	4.46684e-29
217316	Slc16a5	mRNA	ENSMUSG00000045775	1.2921	3.2792e-227	2.61847e-229
70873	Cnbd2	mRNA	ENSMUSG00000038085	1.28711	0	0
69519	Rwdd2a	mRNA	ENSMUSG00000032417	1.27952	0.0110662	0.00339762
320360	Ric3	mRNA	ENSMUSG00000048330	1.27952	0.00142237	0.000333729
100043108	Cyp2c69	mRNA	ENSMUSG00000092008	1.27745	5.53716e-05	9.74935e-06
233005	Cyp2a22	mRNA	ENSMUSG00000091867	1.26047	4.06998e-44	1.30267e-45
22779	Ikzf2	mRNA	ENSMUSG00000025997	1.24042	0.0340349	0.0124132
432995	Smim22	mRNA	ENSMUSG00000096215	1.23645	0.0154006	0.00495999
108168323	Gm46580	mRNA		1.23645	0.000346606	7.08526e-05
105247234	Gm42368	other		1.22867	0	0
18143	Npas2	mRNA	ENSMUSG00000026077	1.2218	1.832e-07	2.29914e-08
14180	Fgf9	mRNA	ENSMUSG00000021974	1.2218	0.0291741	0.0103511
432613	Trim80	mRNA	ENSMUSG00000070332	1.20722	7.18814e-09	7.92571e-10
12501	Cd3e	mRNA	ENSMUSG00000032093	1.20586	0.0249664	0.00862728
57754	Cend1	mRNA	ENSMUSG00000060240	1.19735	0.00964097	0.0029023
207686	Cfap69	mRNA	ENSMUSG00000040473	1.19206	0.00377289	0.000994438
20209	Saa2	mRNA	ENSMUSG00000057465	1.18406	0	0
112422	Zfp979	mRNA	ENSMUSG00000066000	1.16663	0.0156805	0.00506997
14863	Gstm2	mRNA	ENSMUSG00000040562	1.15964	0	0
108167320	LOC108167320	mRNA		1.15141	0.0112557	0.00346329
14917	Gucy2c	mRNA	ENSMUSG00000042638	1.14916	0.000479502	0.000100827
72061	2010111I01Rik	mRNA	ENSMUSG00000021458	1.14565	2.01692e-125	2.71105e-127
13117	Cyp4a10	mRNA	ENSMUSG00000066072	1.13115	0	0
11752	Anxa8	mRNA	ENSMUSG00000021950	1.13066	0.00698478	0.00200508
16324	Inhbb	mRNA	ENSMUSG00000037035	1.12494	3.04078e-09	3.25365e-10
80902	Zfp202	mRNA	ENSMUSG00000025602	1.11971	0.00507649	0.00139411
100113398	Adat3	mRNA	ENSMUSG00000113640	1.11489	0.0152783	0.00491247
280645	B3gat2	mRNA	ENSMUSG00000026156	1.08549	0.00671868	0.00191841
13074	Cyp17a1	mRNA	ENSMUSG00000003555	1.07784	2.00074e-267	1.39791e-269
68695	Hddc3	mRNA	ENSMUSG00000030532	1.07156	0.000379822	7.82997e-05
56185	Hao2	mRNA	ENSMUSG00000027870	1.06653	0.00023414	4.58528e-05
229599	Ciart	mRNA	ENSMUSG00000038550	1.06562	9.31469e-60	2.31814e-61
58866	Treh	mRNA	ENSMUSG00000032098	1.062	7.73308e-18	4.85247e-19
11537	Cfd	mRNA	ENSMUSG00000061780	1.05665	3.21578e-18	1.98579e-19
67606	Fibin	mRNA	ENSMUSG00000074971	1.04123	0.0324626	0.0117188
244886	Tmem266	mRNA	ENSMUSG00000032313	1.03894	0.0275896	0.00968609
209588	Sectm1a	mRNA	ENSMUSG00000025165	1.03503	0.0198476	0.00663393
244091	Fsd2	mRNA	ENSMUSG00000038663	1.03336	0.0168156	0.0054963
69809	1810046K07Rik	mRNA	ENSMUSG00000036027	1.02588	0.0063675	0.00180034
626391	Zfp951	mRNA	ENSMUSG00000072774	1.02326	0.00391895	0.00103711
233878	Sez6l2	mRNA	ENSMUSG00000030683	1.02249	0.00332099	0.000863616
17245	Mdm1	mRNA	ENSMUSG00000020212	1.00875	1.69571e-06	2.36958e-07
15019	H2-Q8	mRNA		1.00236	9.93795e-05	1.81989e-05
56375	B4galt4	mRNA	ENSMUSG00000022793	-1.00059	0.0050993	0.00140139
11982	Atp10a	mRNA	ENSMUSG00000025324	-1.00059	0.0221569	0.00752666
12293	Cacna2d1	mRNA	ENSMUSG00000040118	-1.00059	0.0362577	0.0133481
329739	Fam102b	mRNA	ENSMUSG00000040339	-1.00059	0.0011771	0.000270385
242608	Podn	mRNA	ENSMUSG00000028600	-1.00059	1.42149e-08	1.61181e-09
20568	Slpi	mRNA	ENSMUSG00000017002	-1.00059	0.0188001	0.00622875
20617	Snca	mRNA	ENSMUSG00000025889	-1.00059	0.0362577	0.0133481
24051	Sgcb	mRNA	ENSMUSG00000029156	-1.00059	0.0026564	0.000672231
245038	Dclk3	mRNA	ENSMUSG00000032500	-1.00059	8.27572e-06	1.26933e-06
13082	Cyp26a1	mRNA	ENSMUSG00000024987	-1.00059	0.0022645	0.000559947
213575	Dync2li1	mRNA	ENSMUSG00000024253	-1.00059	0.0426033	0.0161889
30794	Pdlim4	mRNA	ENSMUSG00000020388	-1.00059	0.0426033	0.0161889
270084	Lpcat2	mRNA	ENSMUSG00000033192	-1.00059	0.000438131	9.14279e-05
22762	Zfpm2	mRNA	ENSMUSG00000022306	-1.00059	0.0135422	0.00427496
52666	Arhgef25	mRNA	ENSMUSG00000019467	-1.00059	0.00433472	0.0011656
12700	Cish	mRNA	ENSMUSG00000032578	-1.00347	3.17691e-56	8.41368e-58
22350	Ezr	mRNA	ENSMUSG00000052397	-1.00738	1.26253e-08	1.42736e-09
63913	Fam129a	mRNA	ENSMUSG00000026483	-1.00786	4.12149e-08	4.84607e-09
17390	Mmp2	mRNA	ENSMUSG00000031740	-1.01005	1.93572e-06	2.73588e-07
57246	Tbx20	mRNA	ENSMUSG00000031965	-1.01164	1.22102e-05	1.90692e-06
13823	Epb41l3	mRNA	ENSMUSG00000024044	-1.01494	0.000145406	2.74693e-05
233335	Synm	mRNA	ENSMUSG00000030554	-1.01766	0.000543218	0.00011549
241633	Atp8b4	mRNA	ENSMUSG00000060131	-1.02165	0.00201568	0.000492251
106763	Ttbk1	mRNA	ENSMUSG00000015599	-1.02296	0.0027866	0.000709258
20775	Sqle	mRNA	ENSMUSG00000022351	-1.02377	2.06068e-77	4.12739e-79
20677	Sox4	mRNA	ENSMUSG00000076431	-1.02612	0.00533651	0.00147865
237758	Zfp454	mRNA	ENSMUSG00000048728	-1.02916	0.00872323	0.00257668
21753	Tes	mRNA	ENSMUSG00000029552	-1.03162	0.0120527	0.00374061
20312	Cx3cl1	mRNA	ENSMUSG00000031778	-1.03301	0.0142144	0.00451082
18933	Prrx1	mRNA	ENSMUSG00000026586	-1.03454	0.0166764	0.00544302
12335	Capn3	mRNA	ENSMUSG00000079110	-1.03621	0.0196907	0.00657231
14167	Fgf12	mRNA	ENSMUSG00000022523	-1.03806	0.0232194	0.00794168
170459	Stard4	mRNA	ENSMUSG00000024378	-1.03879	4.48836e-83	8.4224e-85
21923	Tnc	mRNA	ENSMUSG00000028364	-1.04012	0.0273972	0.00960396
74191	P2ry13	mRNA	ENSMUSG00000036362	-1.04162	5.86677e-05	1.03726e-05
76498	Paqr4	mRNA	ENSMUSG00000023909	-1.04223	0.00139635	0.000326323
18591	Pdgfb	mRNA	ENSMUSG00000000489	-1.04241	0.0015193	0.000358947
379043	Raet1e	mRNA	ENSMUSG00000053219	-1.04241	0.0015193	0.000358947
327766	Tmem26	mRNA	ENSMUSG00000060044	-1.04366	0.00179001	0.000430469
14160	Lgr5	mRNA	ENSMUSG00000020140	-1.04431	2.97212e-11	2.69168e-12
74007	Btbd11	mRNA	ENSMUSG00000020042	-1.04639	0.00247457	0.000619631
20392	Sgce	mRNA	ENSMUSG00000004631	-1.04789	7.21653e-07	9.65693e-08
207596	Thsd4	mRNA	ENSMUSG00000032289	-1.05306	0.0047341	0.00128874
17002	Ltf	mRNA	ENSMUSG00000032496	-1.05717	0.0065516	0.00186264
327957	Scimp	mRNA	ENSMUSG00000057135	-1.05717	0.0065516	0.00186264
13118	Cyp4a12b	mRNA	ENSMUSG00000078597	-1.05916	4.25566e-54	1.15538e-55
14118	Fbn1	mRNA	ENSMUSG00000027204	-1.05948	8.50619e-05	1.54411e-05
17268	Meis1	mRNA	ENSMUSG00000020160	-1.06287	0.00113975	0.000260669
27405	Abcg3	mRNA	ENSMUSG00000029299	-1.06472	0.000164815	3.14759e-05
72828	Ubash3b	mRNA	ENSMUSG00000032020	-1.0677	0.0125144	0.00391139
105727	Slc38a1	mRNA	ENSMUSG00000023169	-1.07335	0.00256311	0.000645382
64297	Gprc5b	mRNA	ENSMUSG00000008734	-1.07384	6.31854e-05	1.12429e-05
329628	Fat4	mRNA	ENSMUSG00000046743	-1.08151	0.00417381	0.00111539
21897	Tlr1	mRNA	ENSMUSG00000044827	-1.08305	0.000851242	0.000188539
16551	Kif11	mRNA	ENSMUSG00000012443	-1.08305	0.000851242	0.000188539
268970	Arhgap28	mRNA	ENSMUSG00000024043	-1.08305	0.0240708	0.00828414
319554	Idi1	mRNA	ENSMUSG00000058258	-1.08323	8.45798e-153	9.62413e-155
16956	Lpl	mRNA	ENSMUSG00000015568	-1.08491	7.04386e-20	4.08252e-21
100189605	Mup19	mRNA	ENSMUSG00000078673	-1.09146	0	0
381530	Mup20	mRNA	ENSMUSG00000078672	-1.0933	0	0
243277	Adgrd1	mRNA	ENSMUSG00000044017	-1.0937	0.0333327	0.0121038
209032	Zc3hav1l	mRNA	ENSMUSG00000047749	-1.0937	0.0333327	0.0121038
381484	Gm5150	mRNA	ENSMUSG00000078780	-1.0937	0.0333327	0.0121038
12389	Cav1	mRNA	ENSMUSG00000007655	-1.09607	2.30619e-09	2.44e-10
12504	Cd4	mRNA	ENSMUSG00000023274	-1.09908	3.79471e-09	4.0957e-10
12267	C3ar1	mRNA	ENSMUSG00000040552	-1.10187	8.16166e-06	1.2513e-06
16633	Klra2	mRNA	ENSMUSG00000030187	-1.10493	0.000174928	3.36168e-05
54483	Mefv	mRNA	ENSMUSG00000022534	-1.10493	0.0109587	0.00336024
100042480	Nhsl2	mRNA	ENSMUSG00000079481	-1.1075	0.00309595	0.000799122
105245342	Gm40814	mRNA		-1.11138	2.61172e-24	1.30864e-25
20741	Sptb	mRNA	ENSMUSG00000021061	-1.11607	0.0151722	0.00486726
14745	Lpar1	mRNA	ENSMUSG00000038668	-1.11607	0.00428205	0.00114887
101055987	Gm29758	mRNA		-1.11803	0.0267456	0.00935419
11517	Adcyap1r1	mRNA	ENSMUSG00000029778	-1.11989	0.00141799	0.000332513
16774	Lama3	mRNA	ENSMUSG00000024421	-1.12182	1.63987e-15	1.16541e-16
16651	Sspn	mRNA	ENSMUSG00000030255	-1.12258	0.0177842	0.0058614
215798	Adgrg6	mRNA	ENSMUSG00000039116	-1.12397	0.00166869	0.000397851
11745	Anxa3	mRNA	ENSMUSG00000029484	-1.12513	1.20844e-06	1.66132e-07
70370	Fbln7	mRNA	ENSMUSG00000027386	-1.12612	0.00589302	0.00165305
237886	Slfn9	mRNA	ENSMUSG00000069793	-1.12612	3.89652e-07	5.04566e-08
75607	Wnk2	mRNA	ENSMUSG00000037989	-1.12612	0.00589302	0.00165305
12833	Col6a1	mRNA	ENSMUSG00000001119	-1.12816	1.50784e-26	7.12383e-28
18742	Pitx3	mRNA	ENSMUSG00000025229	-1.13003	4.48661e-06	6.61587e-07
227157	Mpp4	mRNA	ENSMUSG00000079550	-1.1359	0.0168174	0.00549577
20230	Satb1	mRNA	ENSMUSG00000023927	-1.13809	0.0246667	0.00851059
52187	Rragd	mRNA	ENSMUSG00000028278	-1.14743	0.00122851	0.000283258
17974	Nck2	mRNA	ENSMUSG00000066877	-1.14743	5.01399e-05	8.74812e-06
17105	Lyz2	mRNA	ENSMUSG00000069516	-1.1517	2.38926e-92	4.05418e-94
209378	Itih5	mRNA	ENSMUSG00000025780	-1.15208	4.67802e-15	3.44284e-16
72054	Cyp4f18	mRNA	ENSMUSG00000003484	-1.15813	0.0339463	0.0123763
260409	Cdc42ep3	mRNA	ENSMUSG00000036533	-1.16409	0.00198149	0.000482978
56306	Sinhcaf	mRNA	ENSMUSG00000039985	-1.16498	0.000767105	0.000168346
79362	Bhlhe41	mRNA	ENSMUSG00000030256	-1.17051	0.0398726	0.0149323
235330	Ttc12	mRNA	ENSMUSG00000040219	-1.17051	0.0398726	0.0149323
228765	Sdcbp2	mRNA	ENSMUSG00000027456	-1.17051	0.0398726	0.0149323
68054	Serpina12	mRNA	ENSMUSG00000041567	-1.1733	6.11454e-81	1.17994e-82
268396	Sh3pxd2b	mRNA	ENSMUSG00000040711	-1.17424	2.28295e-05	3.74313e-06
215928	Mfsd4b5	mRNA	ENSMUSG00000038528	-1.17908	0.00694839	0.00199232
12332	Capg	mRNA	ENSMUSG00000056737	-1.18501	9.0907e-07	1.23161e-07
109042	Cavin3	mRNA	ENSMUSG00000037060	-1.18501	0.0467402	0.0180206
98660	Atp1a2	mRNA	ENSMUSG00000007097	-1.187	0.000558132	0.000119032
231668	Vsig10	mRNA	ENSMUSG00000066894	-1.18962	0.00144694	0.000340457
331474	Rtl5	mRNA	ENSMUSG00000049191	-1.19323	0.00373514	0.000982996
19126	Prom1	mRNA	ENSMUSG00000029086	-1.19699	0.00169985	0.000405847
171170	Mbnl3	mRNA	ENSMUSG00000036109	-1.19853	0.00956614	0.00287468
69538	Antxr1	mRNA	ENSMUSG00000033420	-1.20222	0.000345388	7.05118e-05
353211	Prune2	mRNA	ENSMUSG00000039126	-1.20704	0.0248004	0.00856246
239652	Zfp641	mRNA	ENSMUSG00000022987	-1.20704	0.0248004	0.00856246
268902	Robo2	mRNA	ENSMUSG00000052516	-1.21632	0.000214685	4.17428e-05
13123	Cyp7b1	mRNA	ENSMUSG00000039519	-1.218	0	0
237711	Eml6	mRNA	ENSMUSG00000044072	-1.22106	0.013114	0.00412321
112417	Ugt2b37	mRNA	ENSMUSG00000057425	-1.22886	5.88505e-05	1.04128e-05
108153	Adamts7	mRNA	ENSMUSG00000032363	-1.23046	2.4595e-07	3.11284e-08
54486	Hpgds	mRNA	ENSMUSG00000029919	-1.23763	0.0152951	0.0049189
73212	3110082I17Rik	mRNA	ENSMUSG00000053553	-1.23763	0.000342474	6.97345e-05
80718	Rab27b	mRNA	ENSMUSG00000024511	-1.23938	0.000761937	0.000166857
17918	Myo5a	mRNA	ENSMUSG00000034593	-1.2416	0.0016823	0.000401432
17523	Mpo	mRNA	ENSMUSG00000009350	-1.2416	0.0338321	0.0123302
15200	Hbegf	mRNA	ENSMUSG00000024486	-1.2416	0.0338321	0.0123302
71690	Esm1	mRNA	ENSMUSG00000042379	-1.2416	0.0338321	0.0123302
229722	5330417C22Rik	mRNA	ENSMUSG00000040412	-1.2416	8.08479e-05	1.46062e-05
12295	Cacnb1	mRNA	ENSMUSG00000020882	-1.24852	0.00812204	0.0023764
13730	Emp1	mRNA	ENSMUSG00000030208	-1.24852	1.00003e-05	1.55116e-06
219151	Scara3	mRNA	ENSMUSG00000034463	-1.25866	5.09661e-13	4.16126e-14
384061	Fndc5	mRNA	ENSMUSG00000001334	-1.26362	0.0395244	0.0147809
234740	Tmem231	mRNA	ENSMUSG00000031951	-1.26362	0.0395244	0.0147809
109828	C7	mRNA	ENSMUSG00000079105	-1.26362	0.00944436	0.00283054
219148	Fam167a	mRNA	ENSMUSG00000035095	-1.26362	0.00228749	0.000565937
93842	Igsf9	mRNA	ENSMUSG00000037995	-1.26362	0.0395244	0.0147809
11568	Aebp1	mRNA	ENSMUSG00000020473	-1.26687	1.6044e-05	2.55478e-06
17844	Mup5	mRNA	ENSMUSG00000058523	-1.26791	6.41753e-07	8.52795e-08
67141	Fbxo5	mRNA	ENSMUSG00000019773	-1.27068	0.00501343	0.00137412
231821	Adap1	mRNA	ENSMUSG00000056413	-1.27622	0.00265456	0.000671234
17470	Cd200	mRNA	ENSMUSG00000022661	-1.27622	0.00265456	0.000671234
12483	Cd22	mRNA	ENSMUSG00000030577	-1.27622	0.00265456	0.000671234
242050	Igsf10	mRNA	ENSMUSG00000036334	-1.27797	0.000150257	2.84456e-05
14803	Grid1	mRNA	ENSMUSG00000041078	-1.2807	0.00140806	0.000329527
380732	Milr1	mRNA	ENSMUSG00000040528	-1.2807	0.0109801	0.00336826
70377	Derl3	mRNA	ENSMUSG00000009092	-1.28883	1.01303e-07	1.23697e-08
13844	Ephb2	mRNA	ENSMUSG00000028664	-1.2901	0.0460063	0.0176963
239081	Tlr11	mRNA	ENSMUSG00000051969	-1.2901	0.0460063	0.0176963
66180	P3h4	mRNA	ENSMUSG00000006931	-1.2901	0.00308709	0.000795397
170721	Papln	mRNA	ENSMUSG00000021223	-1.30099	5.69802e-10	5.70257e-11
55994	Smad9	mRNA	ENSMUSG00000027796	-1.30378	4.68131e-35	1.79116e-36
17076	Ly75	mRNA	ENSMUSG00000026980	-1.30725	0.00190268	0.000460857
58860	Adamdec1	mRNA	ENSMUSG00000022057	-1.30871	0.00100616	0.000226634
53322	Nucb2	mRNA	ENSMUSG00000030659	-1.30934	6.94318e-07	9.26804e-08
67978	Tctn2	mRNA		-1.31318	3.99584e-05	6.83345e-06
72701	Zfp618	mRNA	ENSMUSG00000028358	-1.32252	0.00416683	0.00111297
16497	Kcnab1	mRNA	ENSMUSG00000027827	-1.32252	0.00220623	0.000544071
14841	Haspin	mRNA	ENSMUSG00000050107	-1.32252	0.0282322	0.0099521
13845	Ephb3	mRNA	ENSMUSG00000005958	-1.32252	0.0282322	0.0099521
15002	H2-Ob	mRNA	ENSMUSG00000041538	-1.32252	0.0148754	0.00475027
26432	Plod2	mRNA	ENSMUSG00000032374	-1.32252	0.00116555	0.000267267
14586	Gfra2	mRNA	ENSMUSG00000022103	-1.33762	0.00135388	0.000314776
53883	Celsr2	mRNA	ENSMUSG00000068740	-1.35109	0.000825732	0.000182312
22026	Nr2c2	mRNA	ENSMUSG00000005893	-1.35239	2.03268e-34	7.9262e-36
21939	Cd40	mRNA	ENSMUSG00000017652	-1.35423	0.03267	0.0118143
56277	Tmem45a	mRNA	ENSMUSG00000022754	-1.35423	0.03267	0.0118143
20537	Slc5a1	mRNA	ENSMUSG00000011034	-1.35607	6.31664e-06	9.50355e-07
100039054	Mup12	mRNA	ENSMUSG00000094793	-1.3563	0	0
16998	Ltbp3	mRNA	ENSMUSG00000024940	-1.36796	1.64062e-08	1.87119e-09
55985	Cxcl13	mRNA	ENSMUSG00000023078	-1.36982	3.30611e-23	1.71377e-24
241556	Tspan18	mRNA	ENSMUSG00000027217	-1.36982	0.0104914	0.00319253
27528	Nrep	mRNA	ENSMUSG00000042834	-1.37273	6.83945e-31	2.88997e-32
240725	Sulf1	mRNA	ENSMUSG00000016918	-1.3791	0.000578559	0.000123773
56429	Dpt	mRNA	ENSMUSG00000026574	-1.3791	7.09513e-08	8.5219e-09
13429	Dnm1	mRNA	ENSMUSG00000026825	-1.39291	0.0377115	0.0139762
16373	Irx3	mRNA	ENSMUSG00000031734	-1.39291	0.0377115	0.0139762
226101	Myof	mRNA	ENSMUSG00000048612	-1.39407	2.41671e-10	2.36075e-11
217826	Kcnk13	mRNA	ENSMUSG00000045404	-1.40269	0.00392271	0.00103863
234677	Ces4a	mRNA	ENSMUSG00000060560	-1.40998	1.8931e-11	1.68928e-12
218977	Dlgap5	mRNA	ENSMUSG00000037544	-1.41563	0.0228945	0.00781534
241452	Dhrs9	mRNA	ENSMUSG00000027068	-1.42943	0.00448832	0.00121317
246278	Cd207	mRNA	ENSMUSG00000034783	-1.42943	1.66941e-07	2.08843e-08
67092	Gatm	mRNA	ENSMUSG00000027199	-1.43122	9.74198e-09	1.08583e-09
20348	Sema3c	mRNA	ENSMUSG00000028780	-1.43355	0.0138888	0.00439733
57764	Ntn4	mRNA	ENSMUSG00000020019	-1.43553	1.72555e-05	2.75804e-06
67088	Cand2	mRNA	ENSMUSG00000030319	-1.44116	0.043138	0.0164509
243025	Tmem156	mRNA	ENSMUSG00000037913	-1.44116	0.043138	0.0164509
386655	Eid2	mRNA	ENSMUSG00000046058	-1.44116	0.043138	0.0164509
28248	Slco1a1	mRNA	ENSMUSG00000041698	-1.44204	0	0
338365	Slc41a2	mRNA	ENSMUSG00000034591	-1.44598	4.15999e-105	6.33909e-107
217138	Prr15l	mRNA	ENSMUSG00000047040	-1.45125	0.00166483	0.000396821
18510	Pax8	mRNA	ENSMUSG00000026976	-1.46002	0.0262786	0.0091489
320508	Cachd1	mRNA	ENSMUSG00000028532	-1.46002	0.00512979	0.00141182
66825	Rnf186	mRNA	ENSMUSG00000070661	-1.46526	5.91664e-10	5.93318e-11
16531	Kcnma1	mRNA	ENSMUSG00000063142	-1.47007	0.0031115	0.000804376
231633	Tmem119	mRNA	ENSMUSG00000054675	-1.47452	0.0158317	0.00512571
71213	Cage1	mRNA	ENSMUSG00000044566	-1.47452	0.0158317	0.00512571
20536	Slc4a3	mRNA	ENSMUSG00000006576	-1.47864	0.00189815	0.000459633
100039089	Mup13	mRNA	ENSMUSG00000089873	-1.48003	2.46319e-158	2.73724e-160
17840	Mup1	mRNA	ENSMUSG00000078683	-1.48942	0	0
100102	Pcsk9	mRNA	ENSMUSG00000044254	-1.48955	1.16544e-45	3.62941e-47
109889	Mzf1	mRNA	ENSMUSG00000030380	-1.49535	0.0058351	0.00163544
19700	Rem1	mRNA	ENSMUSG00000000359	-1.50309	0.0494374	0.01922
78369	Icam4	mRNA	ENSMUSG00000001014	-1.50309	0.0494374	0.01922
68738	Acss1	mRNA	ENSMUSG00000027452	-1.50309	0.0494374	0.01922
235533	Gk5	mRNA	ENSMUSG00000041440	-1.50309	0.0494374	0.01922
12159	Bmp4	mRNA	ENSMUSG00000021835	-1.50755	2.87985e-08	3.33824e-09
16552	Kif12	mRNA	ENSMUSG00000028357	-1.51516	0.029898	0.0106348
67971	Tppp3	mRNA	ENSMUSG00000014846	-1.51516	0.029898	0.0106348
74186	Ccdc3	mRNA	ENSMUSG00000026676	-1.52213	4.8939e-07	6.41209e-08
22445	Xlr3a	mRNA	ENSMUSG00000057836	-1.53118	1.92471e-11	1.72005e-12
192897	Itgb4	mRNA	ENSMUSG00000020758	-1.53664	0.00661261	0.0018835
23948	Mmp17	mRNA	ENSMUSG00000029436	-1.53664	0.00661261	0.0018835
12326	Camk4	mRNA	ENSMUSG00000038128	-1.53901	3.75991e-05	6.39995e-06
110310	Krt7	mRNA	ENSMUSG00000023039	-1.55313	0.000537728	0.000114144
100038948	Mup9	mRNA	ENSMUSG00000078686	-1.55613	0	0
93713	Pcdhga5	mRNA	ENSMUSG00000103567	-1.56506	0.0388416	0.0144635
100039028	Mup11	mRNA	ENSMUSG00000073834	-1.58165	0	0
15379	Onecut1	mRNA	ENSMUSG00000043013	-1.58221	4.73009e-33	1.89795e-34
211535	Ccdc114	mRNA	ENSMUSG00000040189	-1.58555	0.0336572	0.0122373
230971	Megf6	mRNA	ENSMUSG00000057751	-1.58555	0.0122509	0.00381842
19739	Rgs9	mRNA	ENSMUSG00000020599	-1.58555	0.00272905	0.000693613
102640043	Gm36210	mRNA	ENSMUSG00000110221	-1.58555	0.0336572	0.0122373
229499	Fcrl1	mRNA	ENSMUSG00000059994	-1.58555	0.0336572	0.0122373
217430	Pqlc3	mRNA	ENSMUSG00000045679	-1.58555	0.00272905	0.000693613
67080	1700019D03Rik	mRNA	ENSMUSG00000043629	-1.58555	0.00451026	0.0012197
12484	Cd24a	mRNA	ENSMUSG00000047139	-1.59329	7.20764e-15	5.34769e-16
64136	Sdf2l1	mRNA	ENSMUSG00000022769	-1.62264	9.58018e-47	2.9452e-48
22750	Zfp9	mRNA	ENSMUSG00000072623	-1.62303	8.16913e-10	8.26263e-11
16518	Kcnj2	mRNA	ENSMUSG00000041695	-1.63286	0.00305023	0.000784681
237211	Fancb	mRNA	ENSMUSG00000047757	-1.64445	0.00830114	0.00243737
353328	Muc6	mRNA	ENSMUSG00000048191	-1.64445	0.00830114	0.00243737
665433	Hist1h2ao	mRNA	ENSMUSG00000094248	-1.65075	0.000404243	8.37915e-05
26888	Clec4a2	mRNA	ENSMUSG00000030148	-1.67197	1.04626e-07	1.28102e-08
18378	Omp	mRNA	ENSMUSG00000074006	-1.67866	0.0374738	0.0138694
225187	Ankrd29	mRNA	ENSMUSG00000057766	-1.67866	0.0374738	0.0138694
14726	Pdpn	mRNA	ENSMUSG00000028583	-1.67866	0.0374738	0.0138694
226075	Glis3	mRNA	ENSMUSG00000052942	-1.70103	4.36991e-05	7.54586e-06
93695	Gpnmb	mRNA	ENSMUSG00000029816	-1.7168	1.49605e-06	2.08559e-07
100048884	Mup18	mRNA	ENSMUSG00000078674	-1.72136	0	0
210530	P3h2	mRNA	ENSMUSG00000038168	-1.72305	0.00136914	0.00031887
101056225	Gm29801	pseudo		-1.724	4.09986e-14	3.14282e-15
223473	Nipal2	mRNA	ENSMUSG00000038879	-1.72922	0.00876114	0.0025908
17178	Fxyd3	mRNA	ENSMUSG00000057092	-1.73755	0.0022509	0.000556134
17755	Map1b	mRNA	ENSMUSG00000052727	-1.73755	0.015057	0.0048223
100039672	Msmp	mRNA	ENSMUSG00000078719	-1.73998	7.36993e-05	1.32264e-05
195046	Nlrp1a	mRNA	ENSMUSG00000069830	-1.74413	0.00763754	0.00221686
93701	Pcdhgb4	mRNA	ENSMUSG00000103585	-1.74616	0.0217899	0.00738895
72614	Pih1d2	mRNA	ENSMUSG00000000167	-1.76612	0.0248402	0.00857954
225207	Zfp521	mRNA	ENSMUSG00000024420	-1.76612	0.0248402	0.00857954
93709	Pcdhga1	mRNA	ENSMUSG00000103144	-1.77219	0.00174547	0.000418132
72789	Veph1	mRNA	ENSMUSG00000027831	-1.80794	0.0408021	0.0153483
19249	Ptpn13	mRNA	ENSMUSG00000034573	-1.80794	1.06777e-07	1.30878e-08
328795	Ubash3a	mRNA	ENSMUSG00000042345	-1.80794	0.0408021	0.0153483
12296	Cacnb2	mRNA	ENSMUSG00000057914	-1.80794	0.0408021	0.0153483
100039206	Mup17	mRNA	ENSMUSG00000096688	-1.81017	0	0
100041658	Mup7	mRNA	ENSMUSG00000073842	-1.83426	0	0
66355	Gmpr	mRNA	ENSMUSG00000000253	-1.84859	0.0161806	0.00525967
319832	Tmem229a	mRNA	ENSMUSG00000048022	-1.85474	3.65069e-05	6.1946e-06
232943	Klc3	mRNA	ENSMUSG00000040714	-1.86041	0.0315372	0.0113134
54216	Pcdh7	mRNA	ENSMUSG00000029108	-1.86309	0.000152168	2.88681e-05
70350	Basp1	mRNA	ENSMUSG00000045763	-1.86566	1.43957e-05	2.28083e-06
93674	Nat8f3	mRNA	ENSMUSG00000051262	-1.87406	0.0325545	0.0117584
19277	Ptpro	mRNA	ENSMUSG00000030223	-1.87506	0.00648353	0.00183897
68423	Ankrd13d	mRNA	ENSMUSG00000005986	-1.87506	0.00648353	0.00183897
434325	Tmem221	mRNA	ENSMUSG00000043664	-1.89367	0.00258623	0.000651892
16669	Krt19	mRNA	ENSMUSG00000020911	-1.8975	3.7773e-11	3.46613e-12
108168411	Gm46650	mRNA		-1.90748	0.0265371	0.00926804
192734	Lrrc75b	mRNA	ENSMUSG00000046807	-1.90748	0.0265371	0.00926804
15220	Foxq1	mRNA	ENSMUSG00000038415	-1.90811	6.47909e-113	9.44185e-115
240063	Zfp811	mRNA	ENSMUSG00000055202	-1.92659	0.0105054	0.00319817
171286	Slc12a8	mRNA	ENSMUSG00000035506	-1.93919	0.00420212	0.00112351
18829	Ccl21a	mRNA	ENSMUSG00000094686	-1.96864	5.0318e-05	8.78255e-06
19207	Ptch2	mRNA	ENSMUSG00000028681	-1.97459	2.4066e-06	3.43023e-07
12876	Cpe	mRNA	ENSMUSG00000037852	-1.97787	3.63956e-07	4.70082e-08
238076	Kcns3	mRNA	ENSMUSG00000043673	-2.00059	0.0428434	0.0163129
58237	Nkain4	mRNA	ENSMUSG00000027574	-2.00059	0.0428434	0.0163129
70676	Gulp1	mRNA	ENSMUSG00000056870	-2.00059	0.00675145	0.00193024
74734	Rhoh	mRNA	ENSMUSG00000029204	-2.00059	0.00675145	0.00193024
17393	Mmp7	mRNA	ENSMUSG00000018623	-2.00059	2.57553e-05	4.24171e-06
268935	Scube3	mRNA	ENSMUSG00000038677	-2.00059	0.0169544	0.0055473
54420	Cldn8	mRNA	ENSMUSG00000050520	-2.00059	0.00107413	0.000243624
22349	Vil1	mRNA	ENSMUSG00000026175	-2.00059	0.0428434	0.0163129
17381	Mmp12	mRNA	ENSMUSG00000049723	-2.00059	0.00107413	0.000243624
19085	Prkar1b	mRNA	ENSMUSG00000025855	-2.00059	0.00269076	0.000682001
270109	Pcnx2	mRNA	ENSMUSG00000060212	-2.00059	0.0428434	0.0163129
214058	Megf11	mRNA	ENSMUSG00000036466	-2.00059	0.0428434	0.0163129
394432	Ugt1a7c	mRNA	ENSMUSG00000090124	-2.05822	0.000728703	0.000158804
74393	Map10	mRNA	ENSMUSG00000050930	-2.07098	0.00430894	0.00115709
15223	Foxj1	mRNA	ENSMUSG00000034227	-2.07098	0.00430894	0.00115709
100039116	Mup14	mRNA	ENSMUSG00000073830	-2.07746	0	0
15013	H2-Q2	mRNA	ENSMUSG00000091705	-2.10593	1.62315e-05	2.58788e-06
56226	Espn	mRNA	ENSMUSG00000028943	-2.11607	0.0272496	0.0095468
14725	Lrp2	mRNA	ENSMUSG00000027070	-2.11607	4.15987e-05	7.14994e-06
64706	Scube1	mRNA	ENSMUSG00000016763	-2.12987	0.000106198	1.95252e-05
108168679	LOC108168679	mRNA		-2.15034	0.0224833	0.00765104
93712	Pcdhga4	mRNA	ENSMUSG00000103677	-2.1689	7.20122e-05	1.29141e-05
399558	Flrt2	mRNA	ENSMUSG00000047414	-2.20222	0.0017083	0.000408318
17869	Myc	mRNA	ENSMUSG00000022346	-2.21751	6.64704e-84	1.23847e-85
76464	Knl1	mRNA	ENSMUSG00000027326	-2.22298	0.0169428	0.00554237
67554	Slc25a30	mRNA	ENSMUSG00000022003	-2.22879	2.0252e-139	2.46614e-141
234421	Cib3	mRNA	ENSMUSG00000074240	-2.23325	2.42625e-06	3.45984e-07
70385	Spdl1	mRNA	ENSMUSG00000069910	-2.24852	0.00424736	0.00113815
20342	Selenbp2	mRNA	ENSMUSG00000068877	-2.25545	0	0
15985	Cd79b	mRNA	ENSMUSG00000040592	-2.2807	6.34851e-05	1.13046e-05
234267	Gpm6a	mRNA	ENSMUSG00000031517	-2.29337	9.01889e-13	7.48373e-14
100039150	Mup15	mRNA	ENSMUSG00000096674	-2.30154	0	0
620807	Mup6	mRNA	ENSMUSG00000078689	-2.32252	0.042388	0.0160718
21940	Cd27	mRNA	ENSMUSG00000030336	-2.32252	0.042388	0.0160718
208080	Ubap1l	mRNA	ENSMUSG00000086228	-2.32252	0.042388	0.0160718
57816	Tesc	mRNA	ENSMUSG00000029359	-2.32252	0.0104979	0.00319521
93880	Pcdhb9	mRNA	ENSMUSG00000051242	-2.32252	0.042388	0.0160718
320802	Ifitm10	mRNA	ENSMUSG00000045777	-2.32252	0.042388	0.0160718
104601	Mycbpap	mRNA	ENSMUSG00000039110	-2.32252	0.042388	0.0160718
12507	Cd5	mRNA	ENSMUSG00000024669	-2.32252	0.042388	0.0160718
330460	Tmem150b	mRNA	ENSMUSG00000046456	-2.38095	0.00777799	0.00226384
102502	Pls1	mRNA	ENSMUSG00000049493	-2.38306	4.02526e-10	4.00169e-11
328059	Slc7a15	mRNA	ENSMUSG00000020600	-2.41563	0.00646174	0.00183085
320705	Bend6	mRNA	ENSMUSG00000042182	-2.46002	0.0259634	0.00902017
75050	Kif27	mRNA	ENSMUSG00000060176	-2.46002	0.0259634	0.00902017
112418	1700102P08Rik	mRNA	ENSMUSG00000032611	-2.46002	0.0259634	0.00902017
19415	Rasal1	mRNA	ENSMUSG00000029602	-2.46002	0.0259634	0.00902017
12173	Bnc1	mRNA	ENSMUSG00000025105	-2.46002	0.0259634	0.00902017
18669	Abcb1b	mRNA	ENSMUSG00000028970	-2.50309	1.10624e-07	1.35814e-08
383435	Ms4a14	mRNA	ENSMUSG00000099398	-2.50309	0.00393711	0.00104349
71907	Serpina9	mRNA	ENSMUSG00000058260	-2.52415	0.00059452	0.000127346
232975	Atp1a3	mRNA	ENSMUSG00000040907	-2.58555	0.015588	0.00503331
12288	Cacna1c	mRNA	ENSMUSG00000051331	-2.58555	0.015588	0.00503331
19132	Prph	mRNA	ENSMUSG00000023484	-2.58555	0.015588	0.00503331
17121	Mxd3	mRNA	ENSMUSG00000021485	-2.58555	0.015588	0.00503331
12683	Cidea	mRNA	ENSMUSG00000024526	-2.58863	2.70904e-67	6.29129e-69
109225	Ms4a7	mRNA	ENSMUSG00000024672	-2.62508	4.61939e-06	6.82088e-07
102639653	LOC102639653	mRNA	ENSMUSG00000094932	-2.62703	0.000249421	4.91938e-05
14734	Gpc3	mRNA	ENSMUSG00000055653	-2.66355	2.7374e-06	3.91812e-07
16182	Il18r1	mRNA	ENSMUSG00000026070	-2.66355	0.00142485	0.000334405
71876	Cenpu	mRNA	ENSMUSG00000031629	-2.66969	0.000406621	8.43385e-05
227632	Kcnt1	mRNA	ENSMUSG00000058740	-2.70103	0.00935488	0.00279532
80910	Gpr84	mRNA	ENSMUSG00000063234	-2.70103	0.00935488	0.00279532
67580	Lrrc18	mRNA	ENSMUSG00000041673	-2.70103	0.00935488	0.00279532
29873	Cspg5	mRNA	ENSMUSG00000032482	-2.70103	0.00935488	0.00279532
17965	Nbl1	mRNA	ENSMUSG00000041120	-2.72305	1.1073e-05	1.72343e-06
26887	Chst4	mRNA	ENSMUSG00000035930	-2.73755	0.000850213	0.000188226
100041194	Ahnak2	mRNA		-2.78195	3.9276e-09	4.24175e-10
217946	Cdca7l	mRNA	ENSMUSG00000021175	-2.78637	0.00299349	0.000769288
73254	Ccdc18	mRNA	ENSMUSG00000056531	-2.80794	0.00554895	0.00154638
110596	Arhgef28	mRNA	ENSMUSG00000021662	-2.80794	0.00554895	0.00154638
16979	Lrrn1	mRNA	ENSMUSG00000034648	-2.80794	0.00554895	0.00154638
16560	Kif1a	mRNA	ENSMUSG00000014602	-2.90748	0.00328161	0.00085272
574437	Xlr3b	mRNA	ENSMUSG00000073125	-2.9797	0.00218606	0.000538224
73649	Cybrd1	mRNA	ENSMUSG00000027015	-3.00059	0.0363301	0.0133845
67313	Inava	mRNA	ENSMUSG00000041605	-3.00059	0.0363301	0.0133845
170441	Slc2a10	mRNA	ENSMUSG00000027661	-3.00059	0.0363301	0.0133845
70717	Medag	mRNA	ENSMUSG00000029659	-3.00059	0.0363301	0.0133845
16012	Igfbp6	mRNA	ENSMUSG00000023046	-3.07098	8.31449e-08	1.00529e-08
208691	Eif5a2	mRNA	ENSMUSG00000050192	-3.08805	0.00112747	0.000257373
216019	Hkdc1	mRNA	ENSMUSG00000020080	-3.08805	0.00112747	0.000257373
16516	Kcnj15	mRNA	ENSMUSG00000062609	-3.17051	0.0210982	0.0071123
105349	Akr1c18	mRNA	ENSMUSG00000021214	-3.17051	0.0210982	0.0071123
271127	Adamts16	mRNA	ENSMUSG00000049538	-3.17051	0.0210982	0.0071123
20311	Cxcl5	mRNA	ENSMUSG00000029371	-3.17051	0.0210982	0.0071123
14365	Fzd3	mRNA	ENSMUSG00000007989	-3.17051	0.000652374	0.000140997
59012	Moxd1	mRNA	ENSMUSG00000020000	-3.17051	0.0210982	0.0071123
170676	Peg10	mRNA	ENSMUSG00000092035	-3.17051	1.94093e-05	3.13328e-06
240332	Slc6a7	mRNA	ENSMUSG00000052026	-3.17051	0.0210982	0.0071123
74574	Lvrn	mRNA	ENSMUSG00000024481	-3.17051	0.0210982	0.0071123
56047	Msln	mRNA	ENSMUSG00000063011	-3.25693	5.45791e-16	3.76984e-17
233813	Vwa3a	mRNA	ENSMUSG00000030889	-3.32252	0.0121587	0.0037812
81897	Tlr9	mRNA	ENSMUSG00000045322	-3.32252	0.0121587	0.0037812
244882	Tnfaip8l3	mRNA	ENSMUSG00000074345	-3.32252	0.0121587	0.0037812
12638	Cftr	mRNA	ENSMUSG00000041301	-3.32252	0.0121587	0.0037812
54612	Sfrp5	mRNA	ENSMUSG00000018822	-3.41563	1.16896e-06	1.60394e-07
105785	Kdelr3	mRNA	ENSMUSG00000010830	-3.46002	0.00700712	0.00201219
12478	Cd19	mRNA	ENSMUSG00000030724	-3.46002	0.00700712	0.00201219
12841	Col9a3	mRNA	ENSMUSG00000027570	-3.58555	0.00403336	0.00107222
27660	1700088E04Rik	mRNA	ENSMUSG00000033029	-3.64166	0.000270123	5.36003e-05
15476	Hs3st1	mRNA	ENSMUSG00000051022	-3.70103	0.00230925	0.000572241
268958	Capn11	mRNA	ENSMUSG00000058626	-3.72851	3.39936e-11	3.09896e-12
100559	Ugt2b38	mRNA	ENSMUSG00000061906	-3.7755	2.74932e-17	1.79653e-18
212190	Ubxn10	mRNA	ENSMUSG00000043621	-3.80794	0.0300135	0.0106859
258581	Olfr1030	mRNA	ENSMUSG00000044923	-3.80794	0.0300135	0.0106859
18163	Ctnnd2	mRNA	ENSMUSG00000022240	-3.80794	0.0300135	0.0106859
74145	F13a1	mRNA	ENSMUSG00000039109	-3.80794	0.00131891	0.000305944
14588	Gfra4	mRNA	ENSMUSG00000027316	-3.80794	0.0300135	0.0106859
100039815	Gm2436	mRNA		-3.83625	3.19621e-05	5.35537e-06
233246	Ano5	mRNA	ENSMUSG00000055489	-4.00059	0.0169671	0.00555426
23845	Clec5a	mRNA	ENSMUSG00000029915	-4.00059	0.0169671	0.00555426
380924	Olfm4	mRNA	ENSMUSG00000022026	-4.00059	0.0169671	0.00555426
23966	Tenm4	mRNA	ENSMUSG00000048078	-4.00059	0.0169671	0.00555426
15496	Hsd3b5	mRNA	ENSMUSG00000038092	-4.02625	0	0
108167434	Gm45988	mRNA		-4.02916	0.0155172	0.0050058
101202	Hepacam2	mRNA	ENSMUSG00000044156	-4.17051	0.00965554	0.00290926
213948	Atg9b	mRNA	ENSMUSG00000038295	-4.17051	0.00965554	0.00290926
78004	Prr15	mRNA	ENSMUSG00000045725	-4.17051	0.00965554	0.00290926
73340	Nptxr	mRNA	ENSMUSG00000022421	-4.17051	0.00965554	0.00290926
140743	Rem2	mRNA	ENSMUSG00000022176	-4.17051	0.00965554	0.00290926
270190	Ephb1	mRNA	ENSMUSG00000032537	-4.17051	0.00965554	0.00290926
105245369	Gm40835	mRNA		-4.17051	0.00965554	0.00290926
100039863	Gm13306	mRNA	ENSMUSG00000073877	-4.25003	0.00726724	0.00209777
93715	Pcdhga7	mRNA	ENSMUSG00000103472	-4.2756	0.0066092	0.00188187
140703	Emid1	mRNA	ENSMUSG00000034164	-4.32252	0.00551179	0.00153474
214593	Duox2	mRNA	ENSMUSG00000068452	-4.32252	0.00551179	0.00153474
100862324	LOC100862324	mRNA	ENSMUSG00000079774	-4.3254	0.00544928	0.00151534
100040048	Ccl27b	mRNA	ENSMUSG00000096826	-4.3254	0.00544928	0.00151534
393082	Mettl7a2	mRNA	ENSMUSG00000056487	-4.3254	0.00544928	0.00151534
93710	Pcdhga2	mRNA	ENSMUSG00000103332	-4.43755	0.00347885	0.000907215
22268	Upk1b	mRNA	ENSMUSG00000049436	-4.46002	1.39402e-05	2.19845e-06
100043034	Rex2	mRNA	ENSMUSG00000067919	-4.4993	1.04068e-07	1.2735e-08
210583	Gm4767	mRNA	ENSMUSG00000094076	-4.66621	0.00122947	0.000283642
73732	Muc16	mRNA	ENSMUSG00000109564	-4.70103	1.41609e-06	1.96187e-07
93699	Pcdhgb1	mRNA	ENSMUSG00000103037	-5.00059	0.000194199	3.75657e-05
93716	Pcdhga8	mRNA	ENSMUSG00000103897	-5.02118	0.000170622	3.27097e-05
70945	Mmrn1	mRNA	ENSMUSG00000054641	-5.24852	3.70517e-05	6.29444e-06
192190	Pkhd1l1	mRNA	ENSMUSG00000038725	-5.49244	3.41408e-11	3.11692e-12
100647	Upk3b	mRNA	ENSMUSG00000042985	-6.08805	1.54776e-16	1.0464e-17
74134	Cyp2s1	mRNA	ENSMUSG00000040703	-6.08805	1.21438e-08	1.36969e-09
12945	Dmbt1	mRNA	ENSMUSG00000047517	-8.74206	1.01571e-41	3.33209e-43
