# Supplementary material for: Loss of miR-23b/27b/24-1 Cluster Impairs Glucose Tolerance via Glycolysis Pathway in Mice
Source: Int J Mol Sci. 2021 Jan 7;22(2):550. doi: 10.3390/ijms22020550 (PMC7826568; doi:10.3390/ijms22020550)
Supplement: Supplementary file 1 [file ijms-22-00550-s001.zip › table S4.xlsx]

## Sheet: glycolysis
Gene ID	Gene Symbol	Type	HFD_KO1	HFD_KO2	HFD_KO3	HFD_WT1	HFD_WT2	HFD_WT3	HFD_KO	HFD_WT	log2 (M_HFD_KO / M_HFD_WT)	Qvalue (M_HFD_KO / M_HFD_WT)
13807	Eno2	glycolysis	0.13	0	0.05	0.03	0	0.08	0.06	0.0366667	0.806766	0.511577
226265	Eno4	glycolysis	0.01	0.02	0.07	0.02	0.01	0	0.0333333	0.01	0.806766	0.511577
11674	Aldoa	glycolysis	107.2	90.36	126.39	59.27	74.07	90.56	107.983	74.6333	0.521836	8.22422e-87
230163	Aldob	glycolysis	3332.44	2623.74	3532.57	2166.2	2280.64	3067.91	3162.92	2504.92	0.332562	0
13806	Eno1	glycolysis	442.69	330.02	374.11	241.65	313.31	377.23	382.273	310.73	0.295947	8.02786e-131
14433	Gapdh	glycolysis	2493.4	1630.16	1966.49	1285.36	1491.49	2134.18	2030.02	1637.01	0.28777	0
103988	Gck	glycolysis	90.43	98.25	95.57	73.69	87.69	86.06	94.75	82.48	0.197835	2.83541e-21
21991	Tpi1	glycolysis	228.5	194.5	196.84	174.66	177.32	210.32	206.613	187.433	0.139071	3.23928e-15
18655	Pgk1	glycolysis	181.94	195.02	213.97	167.42	178.4	198.53	196.977	181.45	0.113355	1.91233e-11
13808	Eno3	glycolysis	2.9	2.41	2.92	2.73	2.01	2.59	2.74333	2.44333	0.108862	0.586037
18648	Pgam1	glycolysis	113.04	90.32	110.37	90.49	89.91	110.4	104.577	96.9333	0.106587	7.97558e-06
14751	Gpi1	glycolysis	74.68	59.6	64.57	54.97	57.31	86.6	66.2833	66.2933	0.000488757	1
14447	Gapdhs	glycolysis	0.38	0.22	0.21	0.21	0.3	0.29	0.27	0.266667	-0.000588973	1
18770	Pklr	glycolysis	102.85	31.68	61.8	50.64	66.84	95.35	65.4433	70.9433	-0.115399	7.89712e-07
72141	Adpgk	glycolysis	8.73	7.71	9.13	9.02	8.47	10.24	8.52333	9.24333	-0.118343	0.124057
18641	Pfkl	glycolysis	9.23	9.06	7.48	10.09	8.02	9.94	8.59	9.35	-0.128681	0.0376206
18746	Pkm	glycolysis	4.05	4.39	4.55	4.48	4.47	6.49	4.33	5.14667	-0.285011	0.00427563
15277	Hk2	glycolysis	0.29	0.13	0.29	0.15	0.23	0.51	0.236667	0.296667	-0.300149	0.344964
18642	Pfkm	glycolysis	4.26	3.13	3.27	4.58	4.05	4.55	3.55333	4.39333	-0.324258	0.000810956
11676	Aldoc	glycolysis	3.34	4.18	4.5	2.89	7.11	5.79	4.00667	5.26333	-0.405225	7.42091e-06
212032	Hk3	glycolysis	0.63	0.54	0.81	0.59	0.72	1.26	0.66	0.856667	-0.419302	0.0692543
56421	Pfkp	glycolysis	0.42	0.46	0.47	0.53	0.57	0.48	0.45	0.526667	-0.450129	0.0572526
15275	Hk1	glycolysis	0.32	0.3	0.4	0.56	0.47	0.62	0.34	0.55	-0.692467	0.00707777
56012	Pgam2	glycolysis	0	0.08	0	0.17	0.08	0.08	0.0266667	0.11	-2.00059	0.28531
216019	Hkdc1	glycolysis	0.03	0	0	0	0.17	0.16	0.01	0.11	-3.08805	0.00112747
